# Supplementary material for: Disease-specific biases in alternative splicing and tissue-specific dysregulation revealed by multitissue profiling of lymphocyte gene expression in type 1 diabetes
Source: HighWire-hosted journal article supplement (doi:10.1101/gr.217984.116), 2017-10-12
Supplement: Supplemental_Figure_S1.pdf [file Supplemental_Figure_S1.pdf]

**A Exons detected**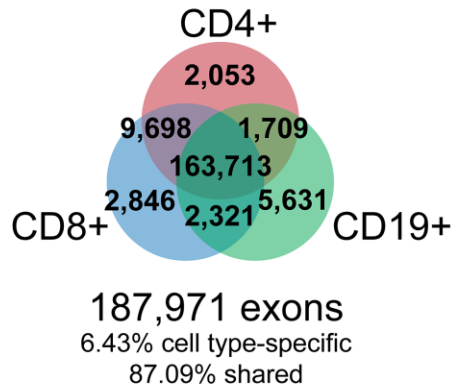**B Differentially-expressed exons**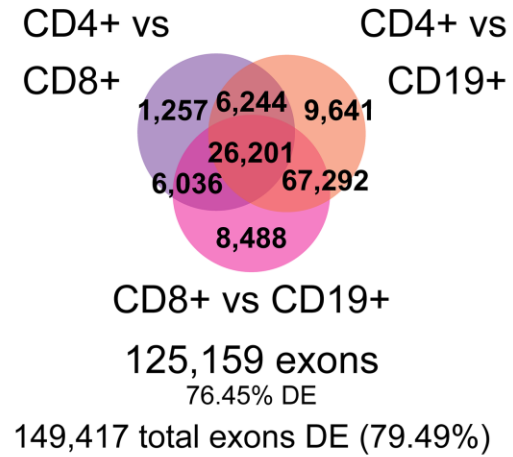**C**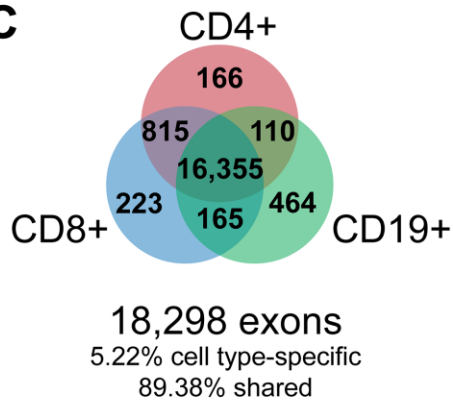**D**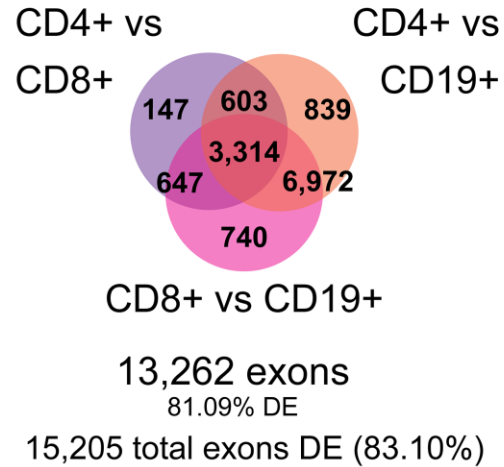**E**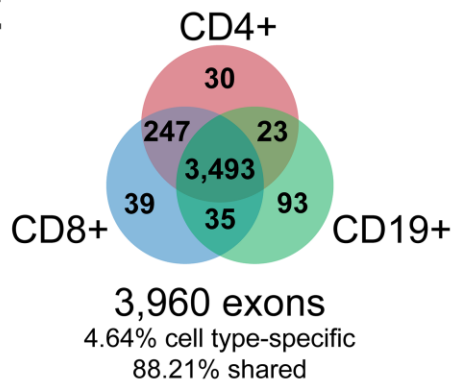**F**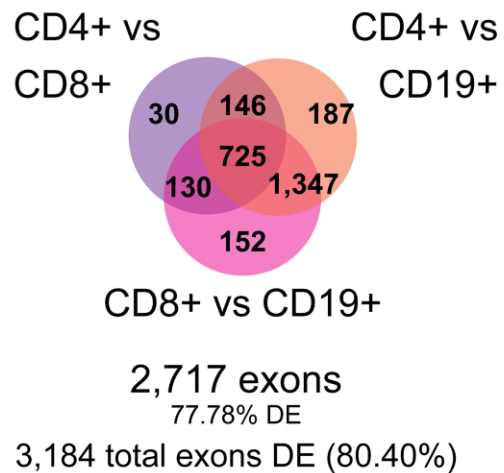

**Supplemental Figure S1. Summary of gene expression analysis.** Exons detected in CD4+ T cells (red), CD8+ cells (blue) and CD19+ B cells (green), for all expressed genes (A), autoimmune candidate genes (C), and T1D candidate genes (E). Most expressed exons and genes are shared among the three lymphocyte classes assayed.

Differentially-expressed exons in CD4+/CD8+ comparison (purple), CD4+/CD19+ comparison (orange) and CD8+/C19+ comparison (pink) for all expressed genes (B), autoimmune candidate genes (D), and T1D candidate genes (F). “Total DE” is the total number of differentially expressed exons defined as the sum of exons detected in one or two tissues and the number of exons detected in all three tissues that are DE.
