# Supplementary material for: Disease-specific biases in alternative splicing and tissue-specific dysregulation revealed by multitissue profiling of lymphocyte gene expression in type 1 diabetes
Source: HighWire-hosted journal article supplement (doi:10.1101/gr.217984.116), 2017-10-12
Supplement: Supplemental_Figure_S2.pdf [file Supplemental_Figure_S2.pdf]

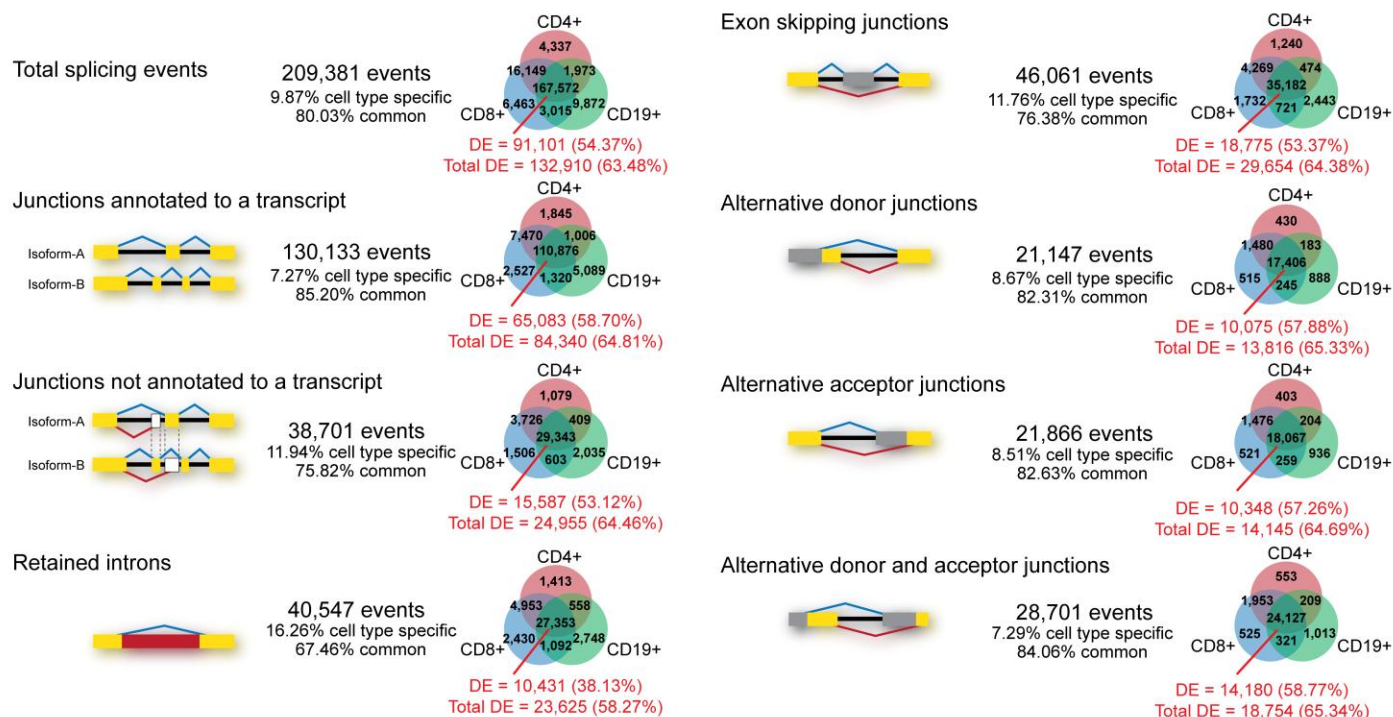

**Supplemental Figure S2.** Splicing events amongst all expressed genes in CD4<sup>+</sup> T (red), CD8<sup>+</sup> T (blue) and CD19<sup>+</sup> B (green) lymphocytes. Counts reported are the number of splicing events detected in each tissue (tissue-specific and shared between two or more tissues). Tissue-specific events for each splicing event type are reported as percentage of all detected splicing events of that event type. Common events are the percentage of splicing events detected in all three tissues, differentially-expressed splicing events (red text) are reported as a proportion of these common events. “Total DE” is the total number of differentially expressed splicing events defined as the sum of splicing events detected in one or two tissues and the number of splicing events detected in all three tissues that are DE.
