# Supplementary material for: Disease-specific biases in alternative splicing and tissue-specific dysregulation revealed by multitissue profiling of lymphocyte gene expression in type 1 diabetes
Source: HighWire-hosted journal article supplement (doi:10.1101/gr.217984.116), 2017-10-12
Supplement: Supplemental_Figure_S3.pdf [file Supplemental_Figure_S3.pdf]

## Autoimmune candidate genes

## T1D candidate genes

Total splicing events

25,470 events  
9.74% cell type specific  
80.31% common

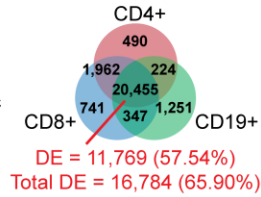

Junctions annotated to a transcript

16,053 events  
6.72% cell type specific  
86.11% common

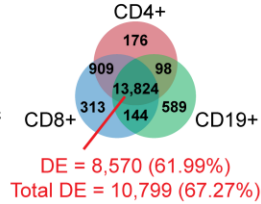

Junctions not annotated to a transcript

4,614 events  
11.83% cell type specific  
75.64% common

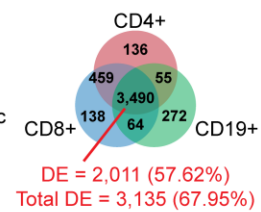

Retained introns

4,803 events  
17.86% cell type specific  
65.40% common

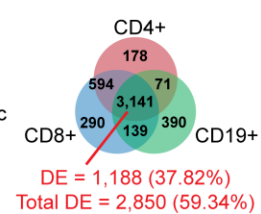

Exon skipping junctions

5,131 events  
12.43% cell type specific  
74.53% common

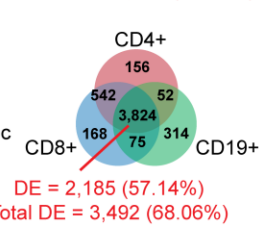

Alternative donor junctions

2,613 events  
8.46% cell type specific  
82.13% common

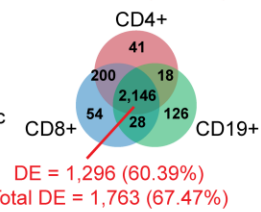

Alternative acceptor junctions

2,745 events  
8.89% cell type specific  
83.02% common

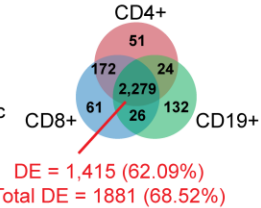

Alternative donor and acceptor junctions

4,402 events  
6.82% cell type specific  
84.73% common

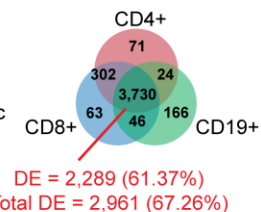

5,861 events  
9.86% cell type specific  
79.87% common

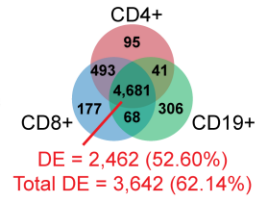

3,633 events  
6.58% cell type specific  
84.97% common

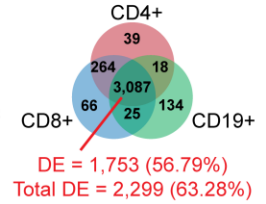

1,091 events  
12.92% cell type specific  
75.99% common

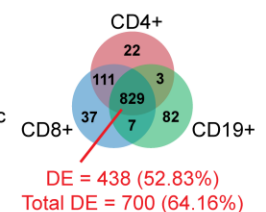

1,137 events  
17.41% cell type specific  
67.28% common

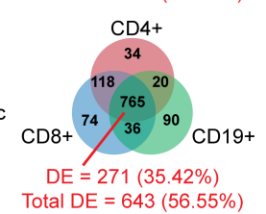

1,099 events  
14.01% cell type specific  
73.07% common

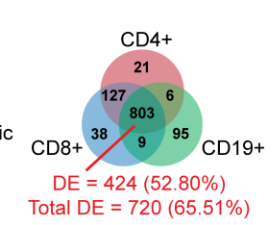

620 events  
9.68% cell type specific  
79.52% common

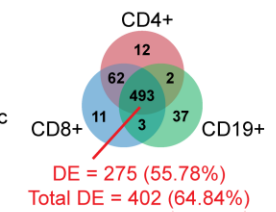

616 events  
10.23% cell type specific  
82.79% common

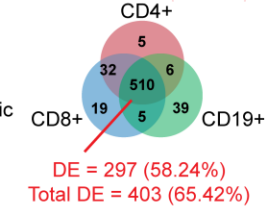

1,201 events  
6.99% cell type specific  
85.18% common

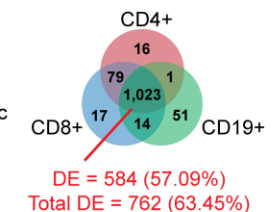

**Supplemental Figure S3.** Splicing events in autoimmune disease and T1D candidate genes detected in the three lymphocyte classes. Splicing events amongst expressed autoimmune and T1D candidate genes from ImmunoBase in CD4<sup>+</sup> T (red), CD8<sup>+</sup> T (blue) and CD19<sup>+</sup> B (green) lymphocytes. Counts reported are the number of splicing events detected in each tissue (tissue-specific and shared between two or more tissues). Tissue-specific events for each splicing event type are reported as percentage of all detected splicing events of that event type. Common events are the percentage of splicing events detected in all three tissues, differentially-expressed splicing events (red text) are reported as a proportion of these common events. “Total DE” is the total number of differentially expressed splicing events defined as the sum of splicing events detected in one or two tissues and the number of splicing events detected in all three tissues that are DE.
