# Supplementary material for: Disease-specific biases in alternative splicing and tissue-specific dysregulation revealed by multitissue profiling of lymphocyte gene expression in type 1 diabetes
Source: HighWire-hosted journal article supplement (doi:10.1101/gr.217984.116), 2017-10-12
Supplement: Supplemental_Figure_S4.pdf [file Supplemental_Figure_S4.pdf]

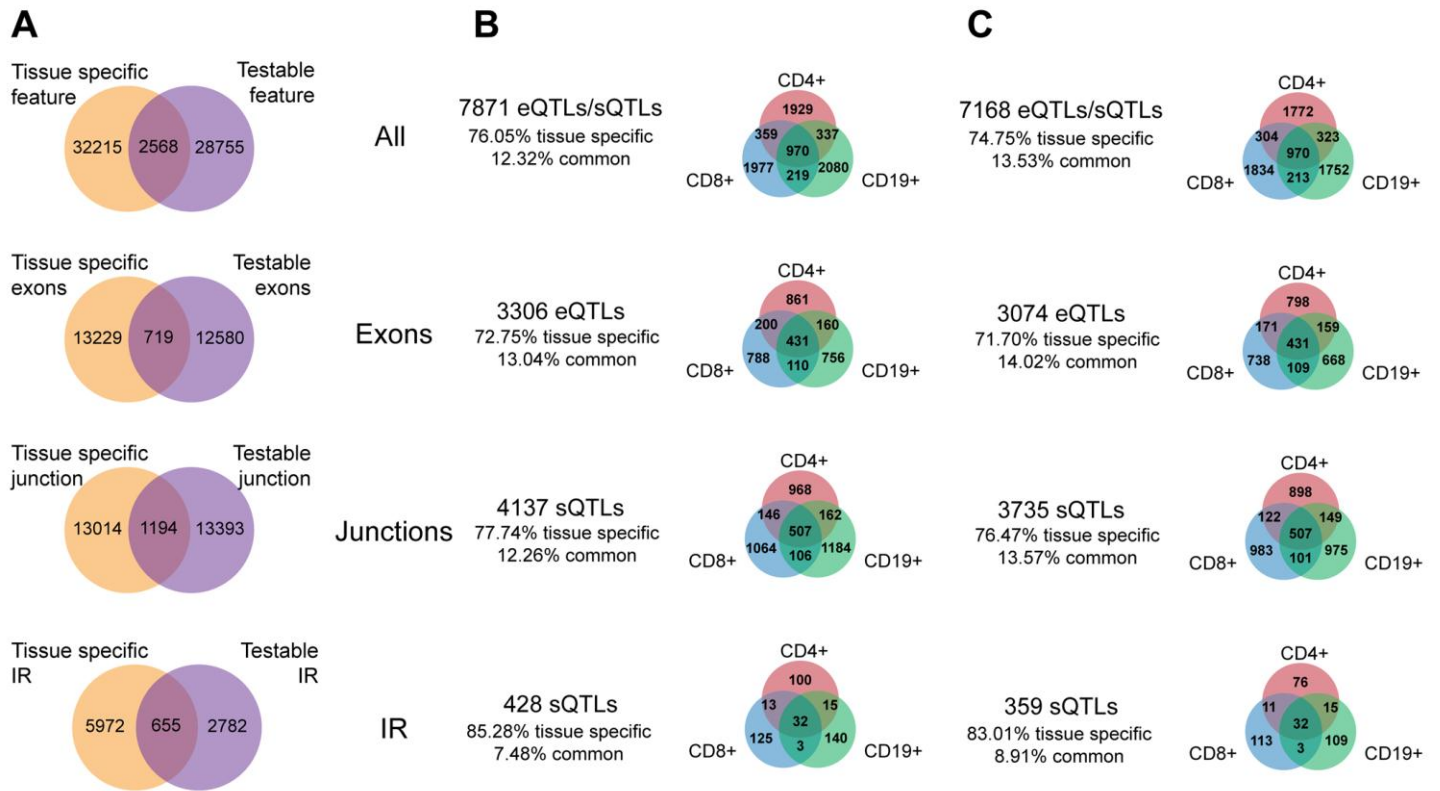

**Supplemental Figure S4.** (A) The proportion of tissue-specific (orange) splicing events and exons and those testable through eQTL (purple). Splicing *cis*-eQTLs in autoimmune disease genes in CD4+ (pink), CD8+ (blue), and CD19+ lymphocytes (green) are summarized as (B) SNPs shared between tissues, (C) SNPs shared between tissues where the associated feature is detected in all three tissues.
