# Supplementary material for: Disease-specific biases in alternative splicing and tissue-specific dysregulation revealed by multitissue profiling of lymphocyte gene expression in type 1 diabetes
Source: HighWire-hosted journal article supplement (doi:10.1101/gr.217984.116), 2017-10-12
Supplement: Supplemental_Figure_S6.pdf [file Supplemental_Figure_S6.pdf]

**A***PTPN22*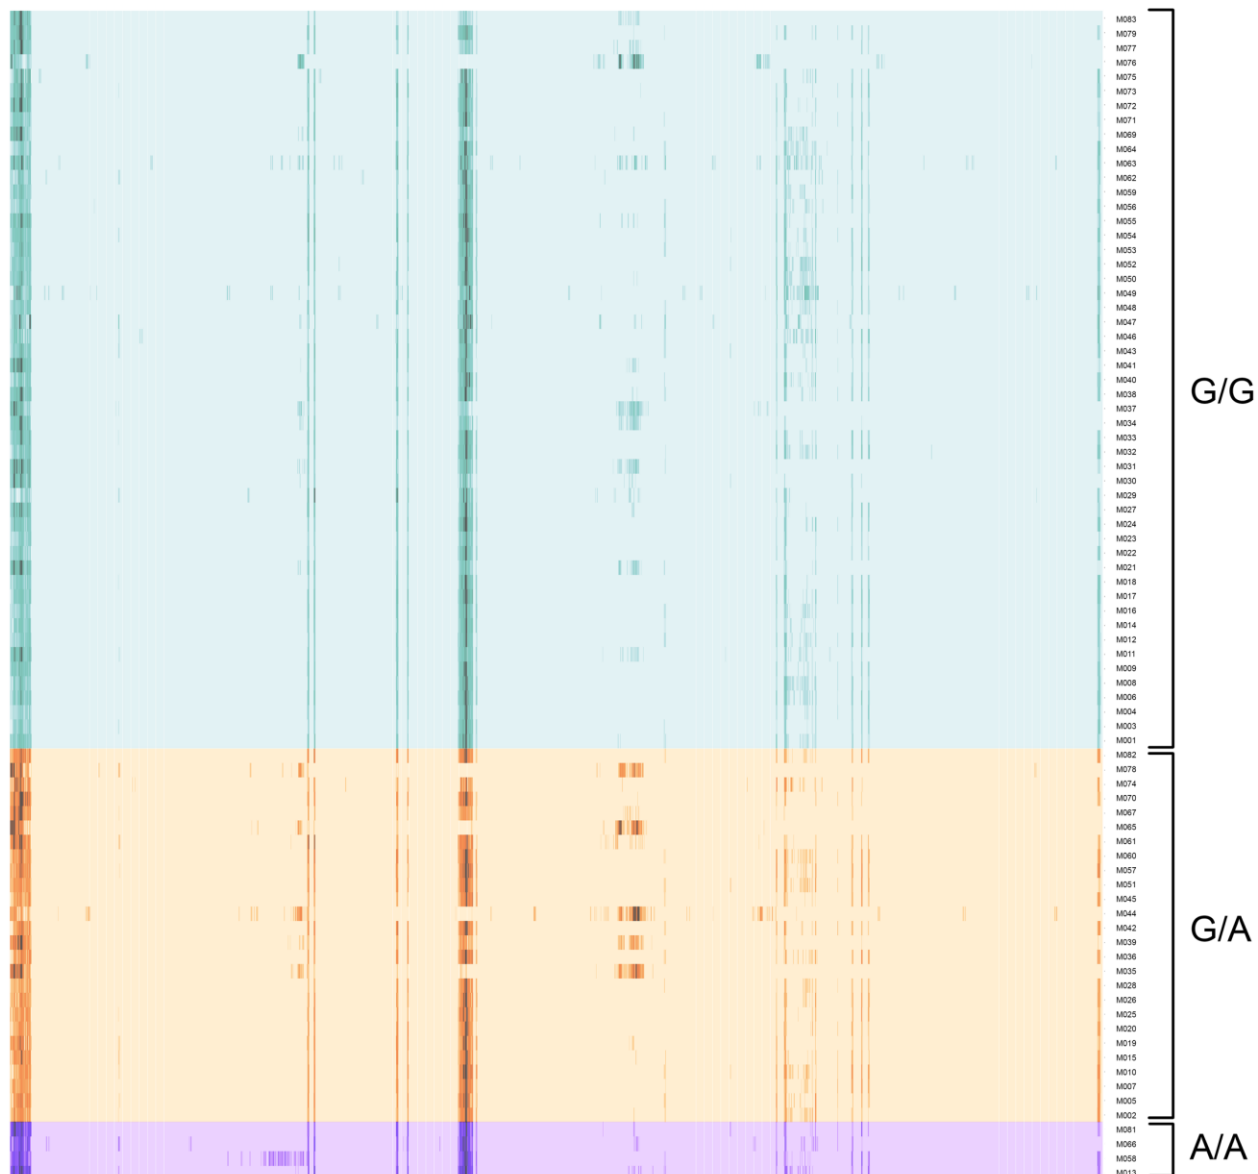**B****rs1217414 G/G**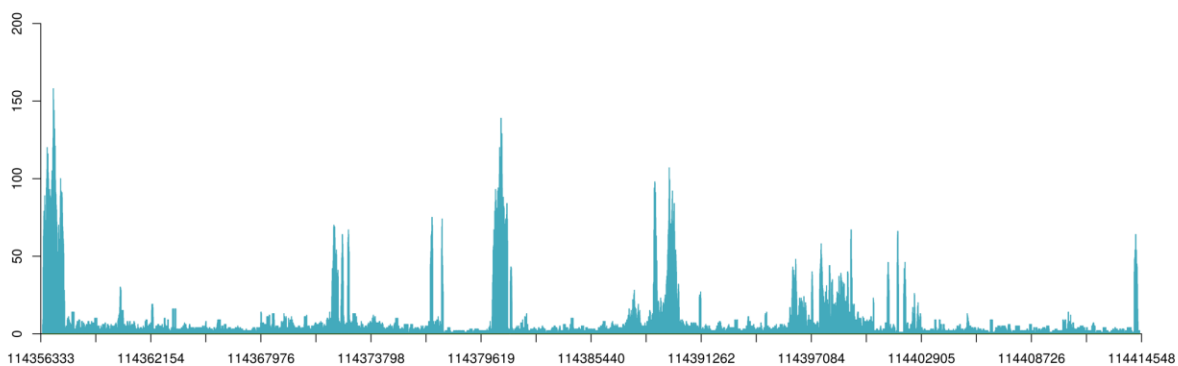

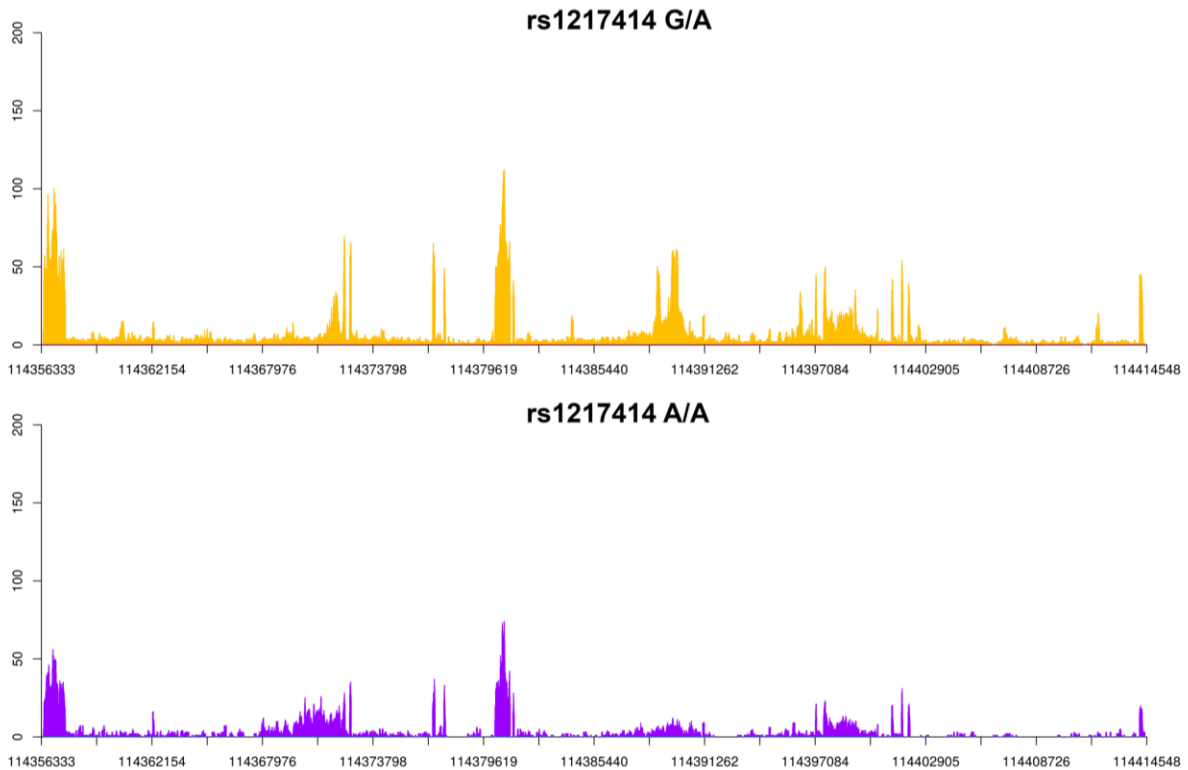

**C**

**Exonic regions (for coverage)**

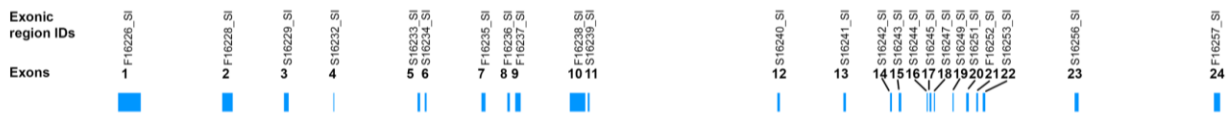

**SNP position**

rs1217414

**Splicing events detected**

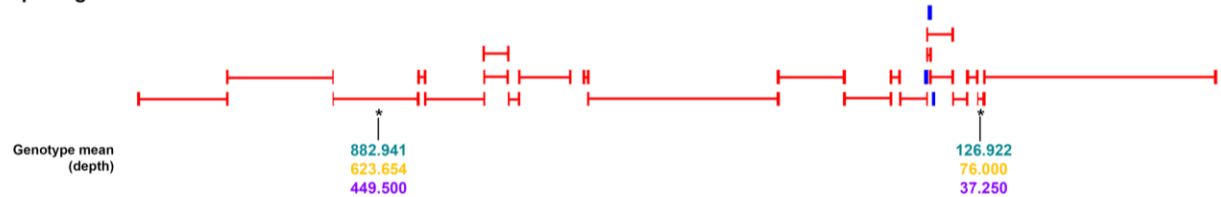

**Aceview gene models**

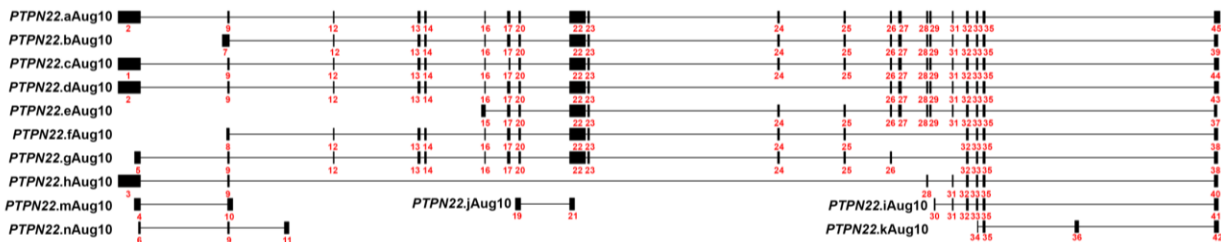

**Supplemental Figure S6. *PTPN22* gene expression by rs1217414 genotypes in CD19+ T cells.** (A) Sequencing coverage across the *PTPN22* gene (scaled by the maximum depth for the locus) for each individual subject. (B) Summary of the distribution of sequencing coverage across *PTPN22* for each genotype of rs1217414: G/G (teal),

G/A (gold), A/A (purple). (C) Splicing events detected in *PTPN22* and *PTPN22* gene models from AceView annotations. Detected junctions are indicated by red bars and detected IR events are indicated by blue blocks. AceView gene models for *PTPN22* are indicated by black blocks and bars, and cyan blocks rs1217414 the collapsed gene model for *PTPN22*. Splicing events and exons associated with rs1893592 are denoted by an asterisk (\*), and the mean coverage for the G/G (teal), G/A (gold), A/A (purple) genotypes are noted. Exons used for coverage (cyan blocks in collapsed gene models) are numbered sequentially by start and stop positions 5' to 3' on the + strand.
