# Supplementary material for: Disease-specific biases in alternative splicing and tissue-specific dysregulation revealed by multitissue profiling of lymphocyte gene expression in type 1 diabetes
Source: HighWire-hosted journal article supplement (doi:10.1101/gr.217984.116), 2017-10-12
Supplement: Supplemental_File_S1.xlsx [file Supplemental_File_S1.xlsx]

## Sheet: Summary
Pool	1	2	3	All
Subjects	32	32	18	82
total_samples	96	96	54	246
num_samples_repeat_pool	59	36	45	140
mean_total_cell_10^6	0.509479	0.570937	0.698889	0.575041
sd_total_cell_10^6	0.429923	0.49936	0.546709	0.487945
mean_live_cell_10^6	0.376223	0.406553	0.501719	0.415607
sd_live_cell_10^6	0.384026	0.441219	0.467349	0.426842
mean_viability	0.614795	0.560687	0.607294	0.592033
sd_viability	0.205332	0.236848	0.203074	0.218313
num_males	18	19	6	43
num_females	14	13	12	39
mean_age	34.5312	30.8125	28.6667	31.7927
sd_age	8.18332	8.54377	7.64661	8.44698
mean_total_reads	5.36843e+07	5.37933e+07	4.65589e+07	5.21627e+07
sd_total_reads	5.72967e+06	8.46017e+06	1.35096e+07	9.42524e+06

## Sheet: all_data
pool	Sample_Description	subject_id	cell_type	flag_repeat_pool	Total Cells (x10^6)	Viability	sex	age	Live cells (x10^6)	total_reads	T1DGC_ID a
1	M001 - CD19+ B-cells	M001	CD19	1	0.125	0.416667	2	48	0.0520833	51502132	46140004
1	M001 - CD8+ T-cells	M001	CD8	1	0.1	0.512821	2	48	0.0512821	60144346	46140004
1	M001 - CD4+ T-cells	M001	CD4	1	0.31	0.826667	2	48	0.256267	51350891	46140004
1	M002 - CD19+ B-cells	M002	CD19	1	0.095	0.2375	1	29	0.0225625	57666275	42703404
1	M002 - CD8+ T-cells	M002	CD8	0	0.3	0.571429	1	29	0.171429	51659206	42703404
1	M002 - CD4+ T-cells	M002	CD4	1	0.835	0.814634	1	29	0.68022	50625412	42703404
1	M003 - CD19+ B-cells	M003	CD19	1	0.04	0.117647	2	45	0.00470588	54016695	44535403
1	M003 - CD8+ T-cells	M003	CD8	1	0.155	0.3875	2	45	0.0600625	50198685	44535403
1	M003 - CD4+ T-cells	M003	CD4	1	0.39	0.639344	2	45	0.249344	50453573	44535403
1	M004 - CD19+ B-cells	M004	CD19	1	0.125	0.324675	2	37	0.0405844	49892836	45360603
1	M004 - CD8+ T-cells	M004	CD8	0	0.23	0.522727	2	37	0.120227	54430021	45360603
1	M004 - CD4+ T-cells	M004	CD4	1	0.295	0.808219	2	37	0.238425	49168395	45360603
1	M005 - CD19+ B-cells	M005	CD19	1	0.18	0.391304	2	35	0.0704348	43146350	40113503
1	M005 - CD8+ T-cells	M005	CD8	1	0.32	0.659794	2	35	0.211134	56026108	40113503
1	M005 - CD4+ T-cells	M005	CD4	1	0.315	0.84	2	35	0.2646	63999078	40113503
1	M006 - CD19+ B-cells	M006	CD19	1	0.545	0.497717	1	42	0.271256	60592657	43522204
1	M006 - CD8+ T-cells	M006	CD8	1	0.695	0.70202	1	42	0.487904	61227446	43522204
1	M006 - CD4+ T-cells	M006	CD4	1	1.19	0.871795	1	42	1.03744	61444640	43522204
1	M007 - CD19+ B-cells	M007	CD19	1	0.25	0.454545	1	31	0.113636	67216717	45813404
1	M007 - CD8+ T-cells	M007	CD8	1	0.275	0.617978	1	31	0.169944	62246228	45813404
1	M007 - CD4+ T-cells	M007	CD4	1	1.14	0.86692	1	31	0.988289	55626299	45813404
1	M008 - CD19+ B-cells	M008	CD19	1	0.245	0.415254	1	29	0.101737	55653621	46871603
1	M008 - CD8+ T-cells	M008	CD8	1	0.185	0.587302	1	29	0.108651	52546896	46871603
1	M008 - CD4+ T-cells	M008	CD4	1	0.86	0.843137	1	29	0.725098	50479464	46871603
1	M009 - CD19+ B-cells	M009	CD19	0	0.4	0.506329	2	30	0.202532	52313159	45551603
1	M009 - CD8+ T-cells	M009	CD8	0	0.965	0.748062	2	30	0.72188	54628302	45551603
1	M009 - CD4+ T-cells	M009	CD4	1	1.095	0.855469	2	30	0.936738	42830871	45551603
1	M010 - CD19+ B-cells	M010	CD19	0	0.495	0.540984	1	26	0.267787	57429528	48785103
1	M010 - CD8+ T-cells	M010	CD8	0	1.16	0.791809	1	26	0.918498	65080516	48785103
1	M010 - CD4+ T-cells	M010	CD4	0	0.92	0.844037	1	26	0.776514	51039363	48785103
1	M011 - CD19+ B-cells	M011	CD19	1	0.22	0.215686	2	26	0.047451	53115031	41256803
1	M011 - CD8+ T-cells	M011	CD8	0	0.73	0.603306	2	26	0.440413	51127497	41256803
1	M011 - CD4+ T-cells	M011	CD4	0	0.2525	0.396078	2	26	0.10001	49660717	41256803
1	M012 - CD19+ B-cells	M012	CD19	0	0.58	0.549763	2	40	0.318863	58429843	42460403
1	M012 - CD8+ T-cells	M012	CD8	0	1.19	0.770227	2	40	0.91657	51898307	42460403
1	M012 - CD4+ T-cells	M012	CD4	0	0.9275	0.629881	2	40	0.584215	59363185	42460403
1	M013 - CD19+ B-cells	M013	CD19	1	0.32	0.512	1	37	0.16384	51966163	45293504
1	M013 - CD8+ T-cells	M013	CD8	1	0.685	0.761111	1	37	0.521361	51448895	45293504
1	M013 - CD4+ T-cells	M013	CD4	1	1.27	0.900709	1	37	1.1439	52335888	45293504
1	M014 - CD19+ B-cells	M014	CD19	1	0.14	0.164706	1	48	0.0230588	51070090	48662103
1	M014 - CD8+ T-cells	M014	CD8	1	0.425	0.57047	1	48	0.24245	53073902	48662103
1	M014 - CD4+ T-cells	M014	CD4	1	0.265	0.638554	1	48	0.169217	52473947	48662103
1	M015 - CD19+ B-cells	M015	CD19	1	0.21	0.362069	1	23	0.0760345	54604649	48854504
1	M015 - CD8+ T-cells	M015	CD8	0	0.965	0.759843	1	23	0.733248	53591736	48854504
1	M015 - CD4+ T-cells	M015	CD4	1	1.07	0.862903	1	23	0.923306	51916465	48854504
1	M016 - CD19+ B-cells	M016	CD19	1	0.235	0.505376	1	42	0.118763	54149321	41959104
1	M016 - CD8+ T-cells	M016	CD8	1	0.78	0.825397	1	42	0.64381	51231650	41959104
1	M016 - CD4+ T-cells	M016	CD4	1	1.05	0.897436	1	42	0.942308	49754486	41959104
1	M017 - CD19+ B-cells	M017	CD19	1	0.115	0.403509	1	26	0.0464035	51293441	47511104
1	M017 - CD8+ T-cells	M017	CD8	0	0.49	0.725926	1	26	0.355704	51698346	47511104
1	M017 - CD4+ T-cells	M017	CD4	1	0.53	0.768116	1	26	0.407101	48191910	47511104
1	M018 - CD19+ B-cells	M018	CD19	1	0.19	0.361905	2	38	0.0687619	51124301	42816004
1	M018 - CD8+ T-cells	M018	CD8	0	0.45	0.775862	2	38	0.349138	85387346	42816004
1	M018 - CD4+ T-cells	M018	CD4	0	1.48	0.886228	2	38	1.31162	47971093	42816004
1	M019 - CD19+ B-cells	M019	CD19	1	0.295	0.578431	1	29	0.170637	49671103	49329904
1	M019 - CD8+ T-cells	M019	CD8	0	0.435	0.685039	1	29	0.297992	56317896	49329904
1	M019 - CD4+ T-cells	M019	CD4	0	0.255	0.75	1	29	0.19125	58955348	49329904
1	M020 - CD19+ B-cells	M020	CD19	0	0.16	0.477612	1	44	0.0764179	49960779	42236403
1	M020 - CD8+ T-cells	M020	CD8	0	0.345	0.657143	1	44	0.226714	47632975	42236403
1	M020 - CD4+ T-cells	M020	CD4	1	0.525	0.789474	1	44	0.414474	52355473	42236403
1	M021 - CD19+ B-cells	M021	CD19	1	0.195	0.661017	2	37	0.128898	50875655	40377504
1	M021 - CD8+ T-cells	M021	CD8	1	0.795	0.84127	2	37	0.66881	49399065	40377504
1	M021 - CD4+ T-cells	M021	CD4	0	1.68	0.903226	2	37	1.51742	53395654	40377504
1	M022 - CD19+ B-cells	M022	CD19	1	0.125	0.520833	2	32	0.0651042	49836862	45383004
1	M022 - CD8+ T-cells	M022	CD8	0	0.63	0.792453	2	32	0.499245	56310852	45383004
1	M022 - CD4+ T-cells	M022	CD4	1	1.07	0.877049	2	32	0.938443	52441049	45383004
1	M023 - CD19+ B-cells	M023	CD19	1	0.075	0.3125	1	22	0.0234375	52577198	48719804
1	M023 - CD8+ T-cells	M023	CD8	1	0.225	0.714286	1	22	0.160714	52187662	48719804
1	M023 - CD4+ T-cells	M023	CD4	1	0.505	0.776923	1	22	0.392346	51709811	48719804
1	M024 - CD19+ B-cells	M024	CD19	1	0.17	0.447368	2	48	0.0760526	50949810	43036603
1	M024 - CD8+ T-cells	M024	CD8	1	0.5	0.724638	2	48	0.362319	52052553	43036603
1	M024 - CD4+ T-cells	M024	CD4	1	1.11	0.816176	2	48	0.905956	49032147	43036603
1	M025 - CD19+ B-cells	M025	CD19	0	0.105	0.381818	2	27	0.0400909	59907770	46895403
1	M025 - CD8+ T-cells	M025	CD8	0	0.13	0.464286	2	27	0.0603571	62506632	46895403
1	M025 - CD4+ T-cells	M025	CD4	1	0.365	0.646018	2	27	0.235796	49912417	46895403
1	M026 - CD19+ B-cells	M026	CD19	1	0.055	0.34375	1	31	0.0189062	49576706	45618603
1	M026 - CD8+ T-cells	M026	CD8	0	0.245	0.7	1	31	0.1715	59074802	45618603
1	M026 - CD4+ T-cells	M026	CD4	1	0.365	0.802198	1	31	0.292802	48557486	45618603
1	M027 - CD19+ B-cells	M027	CD19	1	0.195	0.609375	1	29	0.118828	50413284	48529303
1	M027 - CD8+ T-cells	M027	CD8	0	0.305	0.72619	1	29	0.221488	47826586	48529303
1	M027 - CD4+ T-cells	M027	CD4	0	1.025	0.823293	1	29	0.843876	51070274	48529303
1	M028 - CD19+ B-cells	M028	CD19	0	0.04	0.091954	1	32	0.00367816	48183956	43287404
1	M028 - CD8+ T-cells	M028	CD8	0	0.115	0.511111	1	32	0.0587778	61833044	43287404
1	M028 - CD4+ T-cells	M028	CD4	1	0.115	0.547619	1	32	0.0629762	54742905	43287404
1	M029 - CD19+ B-cells	M029	CD19	0	0.195	0.314516	2	26	0.0613306	52530776	40265303
1	M029 - CD8+ T-cells	M029	CD8	1	0.28	0.651163	2	26	0.182326	59539783	40265303
1	M029 - CD4+ T-cells	M029	CD4	0	1.1	0.694006	2	26	0.763407	50836021	40265303
1	M030 - CD19+ B-cells	M030	CD19	0	0.075	0.2	2	26	0.015	65816884	46047703
1	M030 - CD8+ T-cells	M030	CD8	1	0.045	0.3	2	26	0.0135	49245131	46047703
1	M030 - CD4+ T-cells	M030	CD4	1	0.165	0.540984	2	26	0.0892623	51805188	46047703
1	M031 - CD19+ B-cells	M031	CD19	0	0.97	0.570588	1	40	0.553471	47906176	44997904
1	M031 - CD8+ T-cells	M031	CD8	1	0.395	0.76699	1	40	0.302961	49303660	44997904
1	M031 - CD4+ T-cells	M031	CD4	0	2.115	0.859756	1	40	1.81838	52583692	44997904
1	M032 - CD19+ B-cells	M032	CD19	0	0.16	0.415584	1	50	0.0664935	53948391	40011303
1	M032 - CD8+ T-cells	M032	CD8	0	1.42	0.806818	1	50	1.14568	51464027	40011303
1	M032 - CD4+ T-cells	M032	CD4	0	1.03	0.865546	1	50	0.891513	57927980	40011303
2	M033 - CD19+ B-cells	M033	CD19	1	0.175	0.289256	2	23	0.0506198	53681109	45128903
2	M033 - CD8+ T-cells	M033	CD8	1	0.54	0.734694	2	23	0.396735	51326643	45128903
2	M033 - CD4+ T-cells	M033	CD4	1	0.95	0.798319	2	23	0.758403	51600756	45128903
2	M034 - CD19+ B-cells	M034	CD19	1	0.155	0.210884	1	24	0.0326871	50517292	40827504
2	M034 - CD8+ T-cells	M034	CD8	1	1.03	0.691275	1	24	0.712013	52171669	40827504
2	M034 - CD4+ T-cells	M034	CD4	1	1.555	0.824934	1	24	1.28277	48737617	40827504
2	M035 - CD19+ B-cells	M035	CD19	1	0.135	0.296703	1	23	0.0400549	46846098	48955104
2	M035 - CD8+ T-cells	M035	CD8	0	0.81	0.84375	1	23	0.683438	51891600	48955104
2	M035 - CD4+ T-cells	M035	CD4	0	0.765	0.874286	1	23	0.668829	51440151	48955104
2	M036 - CD19+ B-cells	M036	CD19	0	0.02	0.0714286	2	33	0.00142857	55426161	40067703
2	M036 - CD8+ T-cells	M036	CD8	1	0.07	0.269231	2	33	0.0188462	50446414	40067703
2	M036 - CD4+ T-cells	M036	CD4	1	0.145	0.644444	2	33	0.0934444	49045898	40067703
2	M037 - CD19+ B-cells	M037	CD19	1	0.675	0.560166	2	33	0.378112	55571260	44319703
2	M037 - CD8+ T-cells	M037	CD8	1	1	0.78125	2	33	0.78125	50527418	44319703
2	M037 - CD4+ T-cells	M037	CD4	1	2.22	0.917355	2	33	2.03653	50709979	44319703
2	M038 - CD19+ B-cells	M038	CD19	1	0.35	0.421687	1	23	0.14759	51283025	43201903
2	M038 - CD8+ T-cells	M038	CD8	1	0.7	0.636364	1	23	0.445455	49372620	43201903
2	M038 - CD4+ T-cells	M038	CD4	1	1.29	0.821656	1	23	1.05994	50453625	43201903
2	M039 - CD19+ B-cells	M039	CD19	1	0.31	0.27193	1	38	0.0842982	50137259	46579203
2	M039 - CD8+ T-cells	M039	CD8	0	0.24	0.296296	1	38	0.0711111	49151737	46579203
2	M039 - CD4+ T-cells	M039	CD4	1	0.995	0.59403	1	38	0.59106	49619391	46579203
2	M040 - CD19+ B-cells	M040	CD19	0	0.06	0.11215	1	26	0.00672897	49973420	40473803
2	M040 - CD8+ T-cells	M040	CD8	1	0.13	0.325	1	26	0.04225	47699611	40473803
2	M040 - CD4+ T-cells	M040	CD4	1	0.245	0.690141	1	26	0.169085	49889039	40473803
2	M041 - CD19+ B-cells	M041	CD19	0	1.05	0.606936	1	23	0.637283	50106217	44226403
2	M041 - CD8+ T-cells	M041	CD8	0	0.84	0.827586	1	23	0.695172	54311596	44226403
2	M041 - CD4+ T-cells	M041	CD4	0	1.53	0.857143	1	23	1.31143	56543017	44226403
2	M042 - CD19+ B-cells	M042	CD19	0	0.445	0.419811	1	34	0.186816	52868737	41073903
2	M042 - CD8+ T-cells	M042	CD8	0	1.07	0.761566	1	34	0.814875	51521668	41073903
2	M042 - CD4+ T-cells	M042	CD4	0	1.41	0.836795	1	34	1.17988	53473098	41073903
2	M043 - CD19+ B-cells	M043	CD19	1	0.345	0.425926	1	47	0.146944	50215890	45007203
2	M043 - CD8+ T-cells	M043	CD8	0	0.65	0.778443	1	47	0.505988	56224631	45007203
2	M043 - CD4+ T-cells	M043	CD4	0	0.895	0.840376	1	47	0.752136	53682841	45007203
2	M044 - CD19+ B-cells	M044	CD19	0	0.2	0.119048	1	36	0.0238095	82927924	41077703
2	M044 - CD8+ T-cells	M044	CD8	0	0.16	0.326531	1	36	0.0522449	54626857	41077703
2	M044 - CD4+ T-cells	M044	CD4	0	0.54	0.5	1	36	0.27	64507489	41077703
2	M045 - CD19+ B-cells	M045	CD19	0	0.12	0.292683	2	28	0.035122	50382311	40509203
2	M045 - CD8+ T-cells	M045	CD8	1	0.255	0.62963	2	28	0.160556	49653854	40509203
2	M045 - CD4+ T-cells	M045	CD4	1	0.38	0.622951	2	28	0.236721	51243865	40509203
2	M046 - CD19+ B-cells	M046	CD19	0	0.03	0.0731707	2	33	0.00219512	86190686	47029704
2	M046 - CD8+ T-cells	M046	CD8	0	0.065	0.203125	2	33	0.0132031	54271958	47029704
2	M046 - CD4+ T-cells	M046	CD4	0	0.64	0.472325	2	33	0.302288	51482634	47029704
2	M047 - CD19+ B-cells	M047	CD19	1	0.07	0.10219	2	50	0.00715328	49653255	46993703
2	M047 - CD8+ T-cells	M047	CD8	0	0.295	0.464567	2	50	0.137047	55163276	46993703
2	M047 - CD4+ T-cells	M047	CD4	0	0.595	0.68	2	50	0.4046	58875414	46993703
2	M048 - CD19+ B-cells	M048	CD19	0	0.675	0.594714	1	21	0.401432	60803843	46600704
2	M048 - CD8+ T-cells	M048	CD8	0	1.22	0.661247	1	21	0.806721	61886950	46600704
2	M048 - CD4+ T-cells	M048	CD4	0	1.6	0.846561	1	21	1.3545	12375	46600704
2	M049 - CD19+ B-cells	M049	CD19	0	0.2	0.47619	1	30	0.0952381	67053428	46966303
2	M049 - CD8+ T-cells	M049	CD8	1	0.16	0.711111	1	30	0.113778	52115665	46966303
2	M049 - CD4+ T-cells	M049	CD4	0	1.425	0.919355	1	30	1.31008	51962498	46966303
2	M050 - CD19+ B-cells	M050	CD19	0	0.215	0.462366	1	23	0.0994086	52445700	43445503
2	M050 - CD8+ T-cells	M050	CD8	0	0.445	0.695312	1	23	0.309414	60051194	43445503
2	M050 - CD4+ T-cells	M050	CD4	0	1.395	0.894231	1	23	1.24745	52672703	43445503
2	M051 - CD19+ B-cells	M051	CD19	1	0.23	0.469388	2	26	0.107959	49276314	42874003
2	M051 - CD8+ T-cells	M051	CD8	0	0.15	0.526316	2	26	0.0789474	57078408	42874003
2	M051 - CD4+ T-cells	M051	CD4	0	0.195	0.52	2	26	0.1014	71223497	42874003
2	M052 - CD19+ B-cells	M052	CD19	0	0.14	0.4	2	23	0.056	53928200	47117104
2	M052 - CD8+ T-cells	M052	CD8	0	0.25	0.666667	2	23	0.166667	61747050	47117104
2	M052 - CD4+ T-cells	M052	CD4	0	0.175	0.673077	2	23	0.117788	49898123	47117104
2	M053 - CD19+ B-cells	M053	CD19	0	0.215	0.558442	1	46	0.120065	50720120	44890203
2	M053 - CD8+ T-cells	M053	CD8	1	0.545	0.778571	1	46	0.424321	50204445	44890203
2	M053 - CD4+ T-cells	M053	CD4	1	1.05	0.801527	1	46	0.841603	51766417	44890203
2	M054 - CD19+ B-cells	M054	CD19	0	0.34	0.503704	2	21	0.171259	51226961	45825604
2	M054 - CD8+ T-cells	M054	CD8	0	0.585	0.539171	2	21	0.315415	56419032	45825604
2	M054 - CD4+ T-cells	M054	CD4	1	0.92	0.782979	2	21	0.72034	49765041	45825604
2	M055 - CD19+ B-cells	M055	CD19	0	0.565	0.573604	1	32	0.324086	52511731	40686803
2	M055 - CD8+ T-cells	M055	CD8	0	1.355	0.734417	1	32	0.995136	59455801	40686803
2	M055 - CD4+ T-cells	M055	CD4	0	1.65	0.863874	1	32	1.42539	55816925	40686803
2	M056 - CD19+ B-cells	M056	CD19	0	0.07	0.148936	1	35	0.0104255	50570458	42390803
2	M056 - CD8+ T-cells	M056	CD8	0	0.355	0.596639	1	35	0.211807	54898050	42390803
2	M056 - CD4+ T-cells	M056	CD4	0	0.9	0.841121	1	35	0.757009	53406577	42390803
2	M057 - CD19+ B-cells	M057	CD19	1	0.085	0.21519	2	23	0.0182911	52261063	45818503
2	M057 - CD8+ T-cells	M057	CD8	0	0.325	0.656566	2	23	0.213384	55428059	45818503
2	M057 - CD4+ T-cells	M057	CD4	1	0.49	0.809917	2	23	0.39686	50403059	45818503
2	M058 - CD19+ B-cells	M058	CD19	0	0.09	0.327273	1	24	0.0294545	55466193	47105803
2	M058 - CD8+ T-cells	M058	CD8	0	0.575	0.649718	1	24	0.373588	56022940	47105803
2	M058 - CD4+ T-cells	M058	CD4	0	0.575	0.804196	1	24	0.462413	63691750	47105803
2	M059 - CD19+ B-cells	M059	CD19	0	0.745	0.452888	2	40	0.337401	53674324	49835304
2	M059 - CD8+ T-cells	M059	CD8	0	0.455	0.602649	2	40	0.274205	58967275	49835304
2	M059 - CD4+ T-cells	M059	CD4	0	2.315	0.803819	2	40	1.86084	54209514	49835304
2	M060 - CD19+ B-cells	M060	CD19	0	0.425	0.551948	1	28	0.234578	66095008	45580403
2	M060 - CD8+ T-cells	M060	CD8	0	0.8	0.733945	1	28	0.587156	51587368	45580403
2	M060 - CD4+ T-cells	M060	CD4	0	1.16	0.781145	1	28	0.906128	62329851	45580403
2	M061 - CD19+ B-cells	M061	CD19	1	0.305	0.484127	1	49	0.147659	52046949	48723704
2	M061 - CD8+ T-cells	M061	CD8	0	0.39	0.678261	1	49	0.264522	51713704	48723704
2	M061 - CD4+ T-cells	M061	CD4	1	1.09	0.828897	1	49	0.903498	52973571	48723704
2	M062 - CD19+ B-cells	M062	CD19	1	0.065	0.08125	1	23	0.00528125	50183934	44146004
2	M062 - CD8+ T-cells	M062	CD8	1	0.165	0.3	1	23	0.0495	50732662	44146004
2	M062 - CD4+ T-cells	M062	CD4	1	0.185	0.393617	1	23	0.0728191	49346504	44146004
2	M063 - CD19+ B-cells	M063	CD19	0	0.08	0.097561	2	36	0.00780488	51642213	45101604
2	M063 - CD8+ T-cells	M063	CD8	1	0.17	0.377778	2	36	0.0642222	54835096	45101604
2	M063 - CD4+ T-cells	M063	CD4	0	0.37	0.510345	2	36	0.188828	50480462	45101604
2	M064 - CD19+ B-cells	M064	CD19	0	0.08	0.195122	2	32	0.0156098	57291264	43541904
2	M064 - CD8+ T-cells	M064	CD8	0	0.295	0.662921	2	32	0.195562	53546619	43541904
2	M064 - CD4+ T-cells	M064	CD4	0	0.4	0.769231	2	32	0.307692	64861998	43541904
3	M065 - CD19+ B-cells	M065	CD19	1	0.205	0.554054	2	42	0.113581	47804472	45082404
3	M065 - CD8+ T-cells	M065	CD8	1	0.21	0.75	2	42	0.1575	49210028	45082404
3	M065 - CD4+ T-cells	M065	CD4	1	0.265	0.828125	2	42	0.219453	47610072	45082404
3	M066 - CD19+ B-cells	M066	CD19	1	0.185	0.425287	2	23	0.0786782	51035758	43131604
3	M066 - CD8+ T-cells	M066	CD8	1	0.62	0.613861	2	23	0.380594	46120709	43131604
3	M066 - CD4+ T-cells	M066	CD4	1	0.465	0.808696	2	23	0.376043	52586886	43131604
3	M067 - CD19+ B-cells	M067	CD19	1	0.58	0.50655	2	23	0.293799	48736134	40223703
3	M067 - CD8+ T-cells	M067	CD8	1	0.835	0.773148	2	23	0.645579	48138376	40223703
3	M067 - CD4+ T-cells	M067	CD4	1	1.125	0.858779	2	23	0.966126	50240272	40223703
3	M069 - CD19+ B-cells	M069	CD19	0	0.195	0.443182	2	48	0.0864205	51774926	46975504
3	M069 - CD8+ T-cells	M069	CD8	1	0.55	0.743243	2	48	0.408784	51207455	46975504
3	M069 - CD4+ T-cells	M069	CD4	1	1.185	0.877778	2	48	1.04017	46833546	46975504
3	M070 - CD19+ B-cells	M070	CD19	1	0.43	0.383929	2	21	0.165089	51129353	47190104
3	M070 - CD8+ T-cells	M070	CD8	1	0.74	0.678899	2	21	0.502385	56655198	47190104
3	M070 - CD4+ T-cells	M070	CD4	1	0.695	0.803468	2	21	0.55841	49632357	47190104
3	M071 - CD19+ B-cells	M071	CD19	1	0.29	0.322222	2	25	0.0934444	49220802	46505904
3	M071 - CD8+ T-cells	M071	CD8	1	0.48	0.554913	2	25	0.266358	51608051	46505904
3	M071 - CD4+ T-cells	M071	CD4	1	1.16	0.783784	2	25	0.909189	49971911	46505904
3	M072 - CD19+ B-cells	M072	CD19	1	0.2	0.380952	2	27	0.0761905	45892188	43457304
3	M072 - CD8+ T-cells	M072	CD8	1	0.895	0.813636	2	27	0.728205	50387397	43457304
3	M072 - CD4+ T-cells	M072	CD4	1	1.48	0.808743	2	27	1.19694	48093181	43457304
3	M073 - CD19+ B-cells	M073	CD19	1	0.195	0.348214	1	28	0.0679018	48563649	42052004
3	M073 - CD8+ T-cells	M073	CD8	1	0.32	0.603774	1	28	0.193208	48780941	42052004
3	M073 - CD4+ T-cells	M073	CD4	1	0.895	0.733607	1	28	0.656578	47356574	42052004
3	M074 - CD19+ B-cells	M074	CD19	1	0.105	0.42	2	28	0.0441	50106784	48219503
3	M074 - CD8+ T-cells	M074	CD8	1	0.33	0.741573	2	28	0.244719	50642528	48219503
3	M074 - CD4+ T-cells	M074	CD4	1	1.155	0.895349	2	28	1.03413	37893461	48219503
3	M075 - CD19+ B-cells	M075	CD19	0	0.145	0.243697	1	23	0.0353361	61592134	40118003
3	M075 - CD8+ T-cells	M075	CD8	0	0.19	0.463415	1	23	0.0880488	10913	40118003
3	M075 - CD4+ T-cells	M075	CD4	1	0.445	0.505682	1	23	0.225028	49613962	40118003
3	M076 - CD19+ B-cells	M076	CD19	0	0.435	0.457895	1	36	0.199184	60992387	40301503
3	M076 - CD8+ T-cells	M076	CD8	1	0.98	0.705036	1	36	0.690935	48788087	40301503
3	M076 - CD4+ T-cells	M076	CD4	1	1.27	0.803797	1	36	1.02082	48178177	40301503
3	M077 - CD19+ B-cells	M077	CD19	1	0.23	0.414414	1	27	0.0953153	50893006	43646103
3	M077 - CD8+ T-cells	M077	CD8	1	0.76	0.663755	1	27	0.504454	50465390	43646103
3	M077 - CD4+ T-cells	M077	CD4	0	0.955	0.767068	1	27	0.73255	70020549	43646103
3	M078 - CD19+ B-cells	M078	CD19	1	0.37	0.256055	1	34	0.0947405	47685105	47506303
3	M078 - CD8+ T-cells	M078	CD8	1	1	0.623053	1	34	0.623053	46301523	47506303
3	M078 - CD4+ T-cells	M078	CD4	1	1.21	0.67036	1	34	0.811136	46481574	47506303
3	M079 - CD19+ B-cells	M079	CD19	1	0.445	0.497207	2	33	0.221257	49310038	43651303
3	M079 - CD8+ T-cells	M079	CD8	1	1.39	0.739362	2	33	1.02771	51419963	43651303
3	M079 - CD4+ T-cells	M079	CD4	1	1.49	0.851429	2	33	1.26863	47835464	43651303
3	M080 - CD19+ B-cells	M080	CD19	0	0.015	0.12	2	33	0.0018	8385	44046103
3	M080 - CD8+ T-cells	M080	CD8	0	0.025	0.3125	2	33	0.0078125	29086	44046103
3	M080 - CD4+ T-cells	M080	CD4	1	0.01	0.2	2	33	0.002	7474879	44046103
3	M081 - CD19+ B-cells	M081	CD19	1	0.635	0.48659	2	22	0.308985	49122472	48256704
3	M081 - CD8+ T-cells	M081	CD8	1	1.44	0.791209	2	22	1.13934	51165262	48256704
3	M081 - CD4+ T-cells	M081	CD4	1	1.785	0.836066	2	22	1.49238	48153822	48256704
3	M082 - CD19+ B-cells	M082	CD19	0	0.205	0.386792	1	21	0.0792925	53724611	42968903
3	M082 - CD8+ T-cells	M082	CD8	1	0.49	0.566474	1	21	0.277572	47686005	42968903
3	M082 - CD4+ T-cells	M082	CD4	1	0.835	0.762557	1	21	0.636735	49802712	42968903
3	M083 - CD19+ B-cells	M083	CD19	1	0.715	0.611111	2	22	0.436944	51401010	40721303
3	M083 - CD8+ T-cells	M083	CD8	0	1.805	0.826087	2	22	1.49109	49397206	40721303
3	M083 - CD4+ T-cells	M083	CD4	1	2.675	0.776488	2	22	2.0771	49392362	40721303
(a) T1D Genetic Consortium identifier, which can be used in dbGaP to access SNP genotyping data for each subject
