# Supplementary material for: Disease-specific biases in alternative splicing and tissue-specific dysregulation revealed by multitissue profiling of lymphocyte gene expression in type 1 diabetes
Source: HighWire-hosted journal article supplement (doi:10.1101/gr.217984.116), 2017-10-12
Supplement: Supplemental_File_S2.pdf [file Supplemental_File_S2.pdf]

### Sample excluded from analysis

| Sample name  | Subject ID | Cell type | Reason                             | Excluded from   |
|--------------|------------|-----------|------------------------------------|-----------------|
| PC-2009-0144 | M048       | CD4+      | Mahalanobis distance, low coverage | Entire analysis |
| PC-2009-0221 | M075       | CD8+      | Mahalanobis distance, low coverage | Entire analysis |
| PC-2009-0235 | M080       | CD19+     | Mahalanobis distance, low coverage | Entire analysis |
| PC-2009-0236 | M080       | CD8+      | Mahalanobis distance, low coverage | Entire analysis |
| PC-2009-0237 | M080       | CD4+      | Mahalanobis distance, low coverage | Entire analysis |
| PC-2009-0083 | M028       | CD8+      | Heat map                           | ANOVA           |
| PC-2009-0101 | M034       | CD8+      | Mahalanobis distance               | ANOVA           |
| PC-2009-0104 | M035       | CD8+      | Mahalanobis distance               | ANOVA           |
| PC-2009-0114 | M048       | CD4+      | Heat map                           | ANOVA           |
| PC-2009-0153 | M051       | CD4+      | Mahalanobis distance               | ANOVA           |
| PC-2009-0200 | M067       | CD8+      | Mahalanobis distance               | ANOVA           |
| PC-2009-0212 | M072       | CD8+      | Mahalanobis distance               | ANOVA           |
| PC-2009-0215 | M073       | CD8+      | Mahalanobis distance               | ANOVA           |
| PC-2009-0224 | M076       | CD8+      | Heat map                           | ANOVA           |
| PC-2009-0228 | M077       | CD4+      | Heat map                           | ANOVA           |

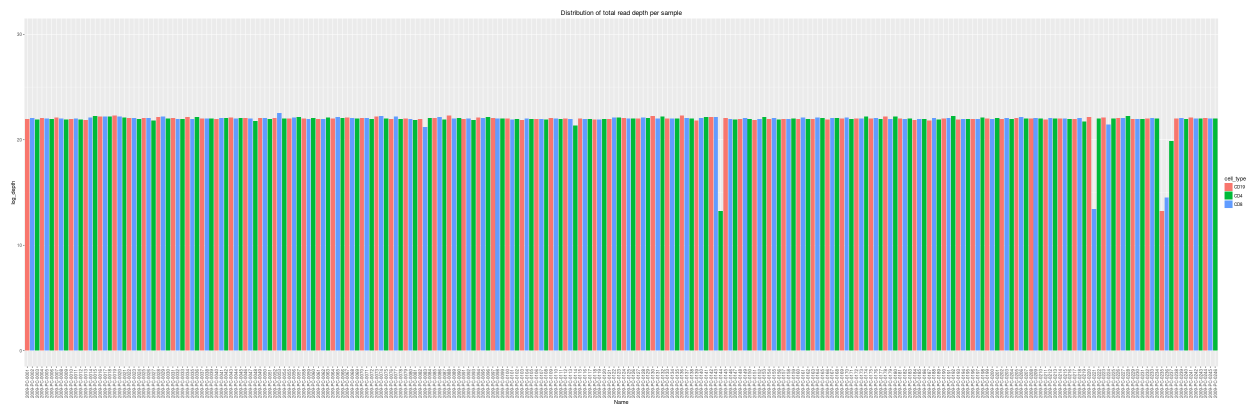

**Summed depth per sample.** Depth at exonic regions was summed by sample and plotted. Red= CD19+; green=CD4+; blue=CD8+.

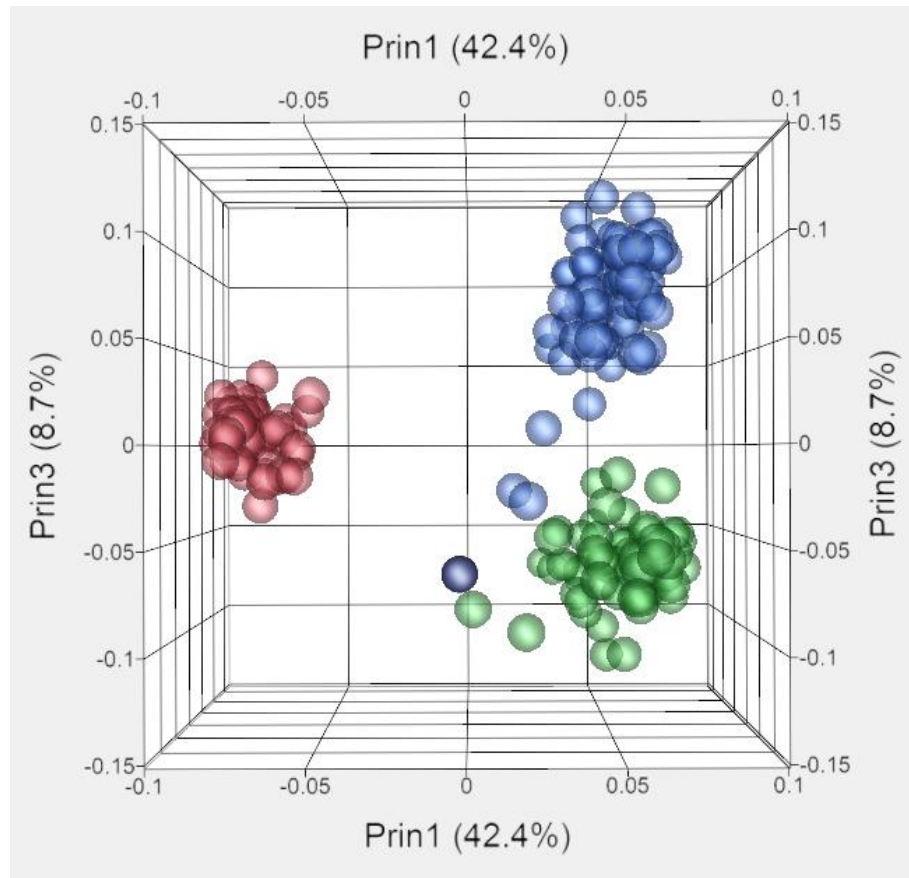

**Clustering of samples by principal components analysis.** All samples were analyzed using principal components analysis to determine whether samples clustered by cell type. Red= CD19+; green=CD4+; blue=CD8+).

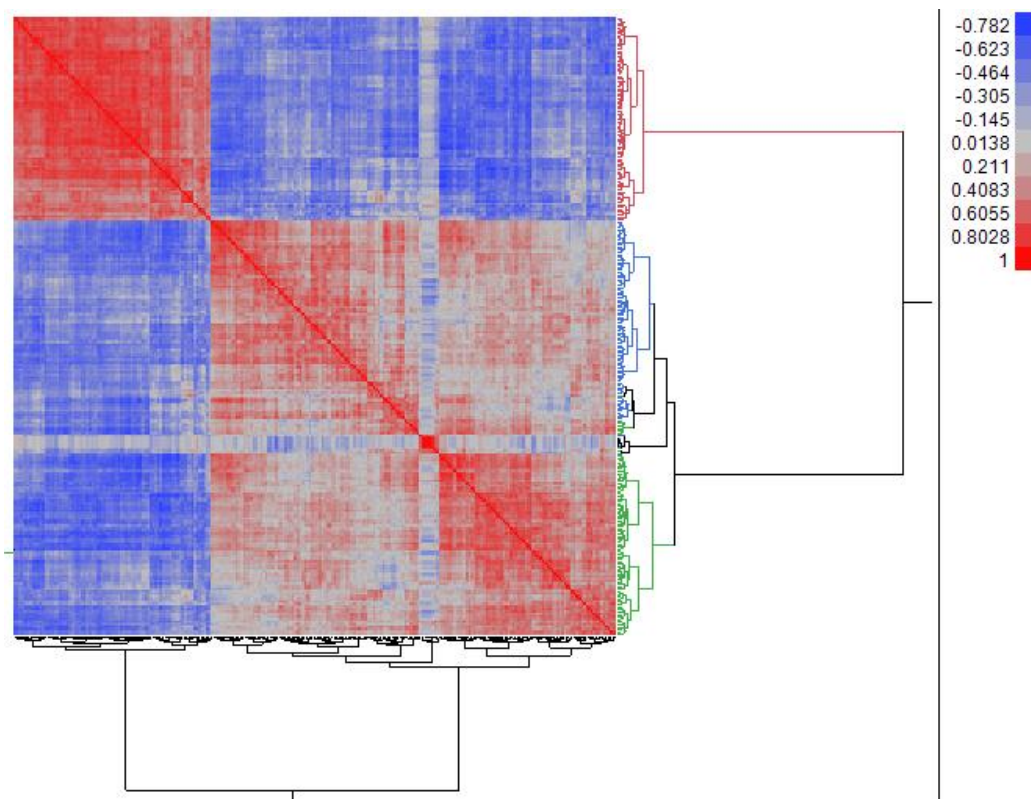

**Hierarchical clustering heatmap by sample.** All samples clustered using hierarchical clustering to determine whether samples clustered by cell type. Red= CD19+; green=CD4+; blue=CD8+.

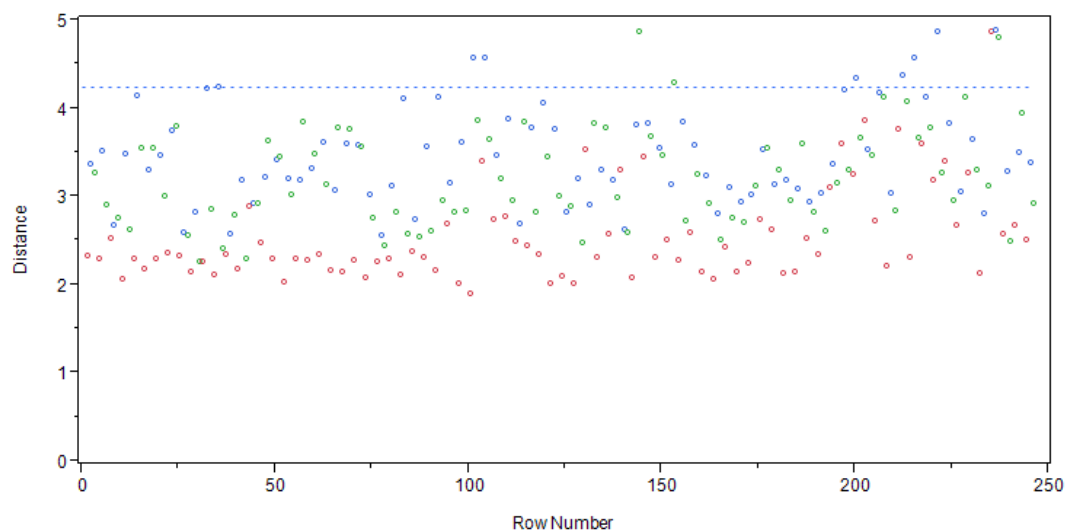

**Mahalanobis distance by sample.** Mahalanobis distances were calculated for each sample to identify potential outliers. Red= CD19+; green=CD4+; blue=CD8+.
