# Supplementary material for: Disease-specific biases in alternative splicing and tissue-specific dysregulation revealed by multitissue profiling of lymphocyte gene expression in type 1 diabetes
Source: HighWire-hosted journal article supplement (doi:10.1101/gr.217984.116), 2017-10-12
Supplement: Supplemental_File_S3.pdf [file Supplemental_File_S3.pdf]

Due to file size upload constraints, Supplemental File 3 can be downloaded here:

[http://bio.rc.ufl.edu/pub/mcintyre/t1d\\_splicing/Supplemental\\_File\\_3.tar.bz2](http://bio.rc.ufl.edu/pub/mcintyre/t1d_splicing/Supplemental_File_3.tar.bz2)
