# Supplementary material for: Disease-specific biases in alternative splicing and tissue-specific dysregulation revealed by multitissue profiling of lymphocyte gene expression in type 1 diabetes
Source: HighWire-hosted journal article supplement (doi:10.1101/gr.217984.116), 2017-10-12
Supplement: Supplemental_Table_S3.docx [file Supplemental_Table_S3.docx]

**Supplementary Table S3. Summary of splicing *cis*-eQTLs in autoimmune disease genes where the associated feature is expressed in only one or two tissues assayed.**

| **Expression and association** | ***cis*-eQTL** |
| --- | --- |
| Expressed in CD4+ only | 26 |
| Expressed in CD8+ only | 30 |
| Expressed in CD19+ only | 255 |
| Expressed in two tissues, association in one tissue | 317 |
| Expressed in two tissues, associations in both tissues | 75 |
