# Supplementary material for: Disease-specific biases in alternative splicing and tissue-specific dysregulation revealed by multitissue profiling of lymphocyte gene expression in type 1 diabetes
Source: HighWire-hosted journal article supplement (doi:10.1101/gr.217984.116), 2017-10-12
Supplement: Supplemental_Table_S4.docx [file Supplemental_Table_S4.docx]

**Supplementary Table S4. SNPs tested as *cis*-eQTL in CD4+, CD8+ and CD19+ lymphocytes**

[Due to file size constraints, Supplemental Table S4 is located here: [https://bio.rc.ufl.edu/pub/mcintyre/t1d_splicing/Supplemental_Table_S4.csv](https://bio.rc.ufl.edu/pub/mcintyre/t1d_splicing/Supplemental_Table_S7.csv) ]
