# Supplementary material for: Disease-specific biases in alternative splicing and tissue-specific dysregulation revealed by multitissue profiling of lymphocyte gene expression in type 1 diabetes
Source: HighWire-hosted journal article supplement (doi:10.1101/gr.217984.116), 2017-10-12
Supplement: Supplemental_Table_S5.docx [file Supplemental_Table_S5.docx]

**Supplementary Table S5. *cis*-eQTLs in T1D candidate genes**

|  | **Total splicing**  ***cis*-eQTLs tested** | | | **Significant exon *cis*-eQTL (FDR<0.05)** | | | **Significant junction cis-eQTL (FDR<0.05)** | | | **Significant IR cis-eQTL (FDR<0.05)** | | |
| --- | --- | --- | --- | --- | --- | --- | --- | --- | --- | --- | --- | --- |
| **Gene ID** | **CD4+** | **CD8+** | **CD19+** | **CD4+** | **CD8+** | **CD19+** | **CD4+** | **CD8+** | **CD19+** | **CD4+** | **CD8+** | **CD19+** |
| *ABCF1* | 441 | 441 | 434 | 0 | 0 | 0 | 0 | 0 | 1 | 0 | 0 | 0 |
| *ACAD10* | 483 | 483 | 455 | 0 | 17 | 0 | 0 | 12 | 3 | 0 | 2 | 0 |
| *ACOXL* | 20 | 30 | 30 | 0 | 0 | 0 | 0 | 0 | 0 | 0 | 0 | 0 |
| *ADAMTS7* | 133 | 418 | 1026 | 0 | 0 | 0 | 0 | 0 | 6 | 0 | 0 | 0 |
| *ADCY3* | 168 | 176 | 196 | 0 | 0 | 0 | 1 | 0 | 0 | 0 | 0 | 0 |
| *AFF3* | 1170 | 715 | 4355 | 0 | 0 | 11 | 0 | 0 | 32 | 0 | 0 | 0 |
| *AGAP2* | 288 | 320 | 288 | 0 | 0 | 0 | 0 | 0 | 0 | 0 | 0 | 0 |
| *AGPAT1* | 40 | 40 | 40 | 0 | 0 | 0 | 0 | 0 | 0 | 0 | 0 | 0 |
| *AIF1* | 27 | 27 | 27 | 0 | 1 | 0 | 0 | 0 | 3 | 0 | 0 | 0 |
| *ALDH2* | 50 | 50 | 56 | 0 | 0 | 0 | 0 | 0 | 0 | 0 | 0 | 0 |
| *ANKRD52* | 60 | 62 | 60 | 0 | 0 | 0 | 0 | 0 | 0 | 0 | 1 | 0 |
| *AP4B1* | 90 | 90 | 90 | 0 | 0 | 0 | 0 | 0 | 0 | 0 | 0 | 0 |
| *APOM* | 40 | 40 | 40 | 0 | 0 | 0 | 0 | 0 | 0 | 0 | 0 | 0 |
| *ASCC2* | 975 | 975 | 915 | 1 | 23 | 1 | 1 | 41 | 1 | 1 | 0 | 0 |
| *ATF6B/TNXB* | 2057 | 2006 | 1224 | 0 | 3 | 0 | 3 | 0 | 0 | 1 | 0 | 1 |
| *ATP2A1* | 28 | 30 | 34 | 0 | 0 | 0 | 0 | 0 | 0 | 0 | 0 | 0 |
| *ATP6V1G2/BAT1/SNORD84* | 396 | 374 | 330 | 0 | 0 | 0 | 4 | 1 | 5 | 0 | 0 | 0 |
| *ATXN2* | 531 | 549 | 477 | 1 | 12 | 0 | 0 | 18 | 0 | 0 | 0 | 0 |
| *ATXN2L* | 136 | 134 | 128 | 0 | 0 | 0 | 1 | 0 | 0 | 0 | 0 | 0 |
| *AVIL* | 246 | 240 | 174 | 0 | 0 | 0 | 0 | 0 | 0 | 0 | 0 | 0 |
| *B3GALT4* | 4 | 4 | 4 | 0 | 0 | 0 | 0 | 0 | 0 | 0 | 0 | 0 |
| *B4GALNT1* | 10 | 15 | 20 | 0 | 0 | 0 | 0 | 0 | 0 | 0 | 0 | 0 |
| *BACH2* | 1770 | 1711 | 2124 | 0 | 2 | 0 | 2 | 2 | 0 | 0 | 0 | 0 |
| *BCAR1* | 81 | 27 | 81 | 6 | 0 | 0 | 0 | 0 | 0 | 0 | 0 | 0 |
| *BCL2L15* | 40 | 40 | 32 | 0 | 0 | 0 | 0 | 0 | 0 | 0 | 0 | 0 |
| *BRAP* | 96 | 96 | 96 | 0 | 8 | 0 | 0 | 9 | 0 | 0 | 0 | 0 |
| *BRD2* | 126 | 132 | 129 | 0 | 0 | 1 | 1 | 2 | 2 | 1 | 0 | 0 |
| *BTNL2* | 0 | 0 | 55 | 0 | 0 | 1 | 0 | 0 | 0 | 0 | 0 | 0 |
| *C14orf181/ZFP36L1* | 90 | 90 | 90 | 2 | 0 | 0 | 0 | 0 | 0 | 1 | 0 | 0 |
| *C14orf64* | 612 | 612 | 216 | 10 | 0 | 0 | 4 | 3 | 0 | 1 | 2 | 0 |
| *C15orf53* | 2 | 1 | 0 | 0 | 0 | 0 | 0 | 0 | 0 | 0 | 0 | 0 |
| *C1orf106* | 42 | 42 | 42 | 0 | 0 | 0 | 0 | 0 | 0 | 0 | 0 | 0 |
| *C1QTNF6/IL2RB* | 2394 | 2850 | 1938 | 1 | 10 | 0 | 6 | 36 | 4 | 0 | 0 | 0 |
| *C2/CFB* | 840 | 798 | 798 | 0 | 1 | 0 | 0 | 0 | 0 | 0 | 0 | 0 |
| *C6orf10* | 0 | 0 | 42 | 0 | 0 | 0 | 0 | 0 | 0 | 0 | 0 | 0 |
| *C6orf136* | 32 | 32 | 32 | 0 | 0 | 0 | 0 | 0 | 0 | 0 | 0 | 0 |
| *C6orf25* | 4 | 6 | 6 | 0 | 0 | 0 | 0 | 0 | 0 | 0 | 0 | 0 |
| *C6orf48/SNORD48/SNORD52* | 48 | 48 | 45 | 0 | 0 | 0 | 0 | 0 | 0 | 0 | 0 | 0 |
| *C7orf71* | 0 | 6 | 9 | 0 | 0 | 0 | 0 | 0 | 0 | 0 | 0 | 0 |
| *CA11* | 36 | 38 | 36 | 0 | 0 | 0 | 0 | 0 | 0 | 0 | 0 | 0 |
| *CABP7* | 0 | 14 | 0 | 0 | 0 | 0 | 0 | 0 | 0 | 0 | 0 | 0 |
| *CCDC101* | 112 | 112 | 108 | 2 | 0 | 2 | 0 | 0 | 1 | 0 | 1 | 1 |
| *CCHCR1* | 1188 | 1215 | 1188 | 21 | 8 | 3 | 27 | 27 | 13 | 0 | 0 | 0 |
| *CCR1* | 12 | 12 | 12 | 0 | 0 | 0 | 0 | 0 | 0 | 0 | 0 | 0 |
| *CCR2* | 15 | 15 | 5 | 0 | 0 | 0 | 0 | 0 | 0 | 0 | 0 | 0 |
| *CCR3* | 40 | 40 | 40 | 0 | 0 | 0 | 0 | 0 | 0 | 0 | 0 | 0 |
| *CCR5* | 14 | 14 | 14 | 0 | 0 | 0 | 0 | 0 | 0 | 0 | 0 | 0 |
| *CCR7* | 63 | 63 | 63 | 0 | 0 | 0 | 1 | 0 | 0 | 0 | 0 | 0 |
| *CCRL2* | 14 | 14 | 14 | 0 | 0 | 0 | 0 | 0 | 0 | 0 | 0 | 0 |
| *CD19* | 44 | 56 | 88 | 0 | 0 | 0 | 0 | 0 | 0 | 0 | 0 | 0 |
| *CD226* | 950 | 800 | 550 | 1 | 12 | 0 | 0 | 1 | 0 | 0 | 0 | 0 |
| *CD69* | 126 | 126 | 126 | 0 | 0 | 0 | 0 | 0 | 0 | 0 | 0 | 0 |
| *CDC37* | 200 | 210 | 190 | 0 | 0 | 0 | 0 | 0 | 0 | 0 | 0 | 0 |
| *CDK12* | 637 | 637 | 611 | 0 | 0 | 0 | 1 | 0 | 8 | 0 | 0 | 0 |
| *CDK2* | 65 | 65 | 70 | 0 | 0 | 0 | 0 | 0 | 0 | 0 | 0 | 0 |
| *CDK4* | 60 | 60 | 70 | 0 | 0 | 0 | 0 | 0 | 0 | 0 | 0 | 0 |
| *CENPO* | 16 | 16 | 16 | 0 | 0 | 0 | 0 | 0 | 0 | 0 | 0 | 0 |
| *CENPW* | 40 | 40 | 40 | 1 | 1 | 4 | 2 | 0 | 2 | 0 | 0 | 0 |
| *CHST10* | 72 | 90 | 84 | 0 | 0 | 2 | 0 | 0 | 0 | 0 | 0 | 0 |
| *CHST6* | 9 | 9 | 9 | 0 | 0 | 1 | 0 | 0 | 0 | 0 | 0 | 0 |
| *CIITA* | 1482 | 1482 | 2014 | 3 | 0 | 0 | 0 | 2 | 1 | 0 | 0 | 0 |
| *CLEC16A* | 6486 | 6768 | 6627 | 9 | 11 | 14 | 16 | 2 | 51 | 0 | 0 | 0 |
| *CLEC2D/NPM1P16/NPM1P7* | 2257 | 2442 | 1924 | 21 | 16 | 17 | 25 | 14 | 13 | 1 | 2 | 0 |
| *CLECL1* | 98 | 98 | 112 | 7 | 6 | 0 | 0 | 0 | 2 | 0 | 0 | 0 |
| *CLIC1* | 22 | 22 | 28 | 0 | 0 | 0 | 0 | 0 | 0 | 0 | 0 | 0 |
| *CLN3* | 325 | 335 | 300 | 1 | 0 | 0 | 2 | 0 | 1 | 1 | 0 | 0 |
| *COBL* | 27 | 27 | 0 | 0 | 0 | 0 | 0 | 0 | 0 | 0 | 0 | 0 |
| *COL11A2* | 1020 | 1258 | 255 | 1 | 2 | 0 | 1 | 2 | 0 | 0 | 0 | 0 |
| *COQ10A* | 9 | 10 | 10 | 0 | 0 | 0 | 0 | 0 | 0 | 0 | 0 | 0 |
| *CSF3* | 6 | 9 | 18 | 0 | 0 | 0 | 0 | 0 | 0 | 0 | 0 | 0 |
| *CSNK2B/LY6G5B* | 75 | 80 | 80 | 0 | 0 | 0 | 0 | 0 | 0 | 0 | 0 | 0 |
| *CTDSP2* | 168 | 184 | 160 | 0 | 0 | 0 | 0 | 0 | 0 | 0 | 0 | 0 |
| *CTLA4* | 40 | 32 | 16 | 0 | 0 | 0 | 0 | 0 | 0 | 0 | 0 | 0 |
| *CTSH* | 340 | 340 | 544 | 0 | 0 | 0 | 0 | 6 | 5 | 0 | 0 | 2 |
| *CUTA* | 18 | 18 | 18 | 0 | 0 | 0 | 0 | 0 | 0 | 0 | 0 | 0 |
| *CUX2* | 117 | 39 | 39 | 0 | 0 | 0 | 0 | 0 | 0 | 0 | 0 | 0 |
| *CYP27B1* | 64 | 52 | 60 | 0 | 0 | 0 | 0 | 0 | 0 | 0 | 0 | 0 |
| *DACT3* | 24 | 32 | 40 | 0 | 0 | 0 | 0 | 0 | 0 | 0 | 0 | 0 |
| *DAXX* | 45 | 45 | 45 | 0 | 0 | 0 | 0 | 0 | 0 | 0 | 0 | 0 |
| *DBP* | 18 | 18 | 15 | 0 | 0 | 0 | 0 | 0 | 0 | 0 | 0 | 0 |
| *DCLRE1B* | 48 | 48 | 48 | 0 | 0 | 0 | 0 | 0 | 0 | 0 | 0 | 0 |
| *DDC* | 224 | 224 | 224 | 0 | 0 | 0 | 0 | 0 | 0 | 0 | 0 | 3 |
| *DDR1* | 363 | 363 | 396 | 0 | 0 | 0 | 0 | 0 | 4 | 0 | 0 | 0 |
| *DDX59* | 25 | 26 | 24 | 0 | 0 | 0 | 0 | 0 | 0 | 0 | 0 | 0 |
| *DEXI* | 76 | 114 | 95 | 0 | 0 | 0 | 0 | 0 | 0 | 0 | 0 | 0 |
| *DHX16* | 90 | 90 | 90 | 0 | 0 | 0 | 0 | 0 | 3 | 0 | 0 | 0 |
| *DNMT3A* | 2576 | 2622 | 2484 | 1 | 0 | 0 | 2 | 0 | 8 | 0 | 0 | 0 |
| *DTX3* | 26 | 26 | 16 | 0 | 0 | 0 | 0 | 0 | 0 | 0 | 0 | 0 |
| *EHMT2* | 464 | 456 | 440 | 0 | 1 | 0 | 0 | 1 | 2 | 0 | 0 | 0 |
| *EIF3C* | 43 | 45 | 44 | 0 | 0 | 1 | 0 | 1 | 0 | 0 | 0 | 0 |
| *ERBB2* | 432 | 432 | 423 | 0 | 0 | 2 | 0 | 0 | 0 | 0 | 0 | 0 |
| *ERBB3/PA2G4* | 462 | 456 | 198 | 0 | 1 | 0 | 0 | 2 | 0 | 1 | 0 | 0 |
| *ERP29* | 18 | 18 | 18 | 0 | 0 | 0 | 0 | 0 | 0 | 0 | 0 | 0 |
| *ESRRA* | 14 | 16 | 16 | 0 | 0 | 0 | 0 | 0 | 0 | 0 | 0 | 0 |
| *ESYT1* | 240 | 244 | 228 | 0 | 0 | 0 | 0 | 0 | 0 | 0 | 0 | 0 |
| *FAM109A* | 8 | 8 | 8 | 0 | 0 | 0 | 0 | 0 | 0 | 0 | 0 | 0 |
| *FAM119B/TSFM* | 208 | 208 | 184 | 10 | 8 | 7 | 3 | 4 | 2 | 0 | 0 | 1 |
| *FBXL20* | 360 | 348 | 324 | 0 | 0 | 0 | 0 | 6 | 4 | 0 | 0 | 0 |
| *FIGNL1* | 16 | 18 | 18 | 1 | 2 | 1 | 2 | 2 | 1 | 0 | 0 | 0 |
| *FKBPL* | 2 | 2 | 2 | 0 | 0 | 0 | 0 | 0 | 0 | 0 | 0 | 0 |
| *FKRP* | 361 | 342 | 342 | 0 | 0 | 0 | 1 | 0 | 0 | 0 | 0 | 0 |
| *FLOT1* | 224 | 224 | 200 | 0 | 0 | 0 | 3 | 4 | 3 | 0 | 0 | 0 |
| *FLRT1* | 3 | 3 | 6 | 0 | 0 | 0 | 0 | 0 | 0 | 0 | 0 | 0 |
| *FUT1* | 24 | 24 | 24 | 0 | 0 | 0 | 0 | 0 | 0 | 0 | 0 | 0 |
| *FUT2* | 5 | 10 | 5 | 0 | 0 | 0 | 0 | 0 | 0 | 0 | 0 | 0 |
| *FYCO1* | 1258 | 1292 | 1190 | 1 | 0 | 2 | 14 | 9 | 2 | 0 | 0 | 0 |
| *GCA* | 100 | 95 | 110 | 0 | 0 | 0 | 0 | 0 | 0 | 0 | 0 | 0 |
| *GLIS3* | 490 | 490 | 490 | 0 | 0 | 0 | 0 | 0 | 0 | 0 | 0 | 0 |
| *GNL1* | 108 | 112 | 104 | 0 | 0 | 0 | 0 | 0 | 0 | 0 | 0 | 0 |
| *GPR18* | 24 | 24 | 16 | 0 | 0 | 0 | 0 | 0 | 0 | 0 | 0 | 0 |
| *GRB10* | 870 | 660 | 60 | 3 | 0 | 0 | 0 | 0 | 0 | 0 | 0 | 0 |
| *GRB7* | 16 | 12 | 44 | 0 | 0 | 0 | 0 | 0 | 0 | 0 | 0 | 0 |
| *GSDMA* | 300 | 240 | 20 | 15 | 14 | 0 | 5 | 2 | 0 | 0 | 0 | 0 |
| *GSDMB* | 224 | 216 | 160 | 2 | 17 | 25 | 10 | 24 | 12 | 0 | 0 | 0 |
| *GTF2H4/VARS2* | 630 | 623 | 630 | 41 | 14 | 51 | 8 | 2 | 31 | 0 | 1 | 0 |
| *HCG27* | 72 | 72 | 64 | 0 | 0 | 0 | 0 | 0 | 0 | 0 | 0 | 0 |
| *HIPK1* | 297 | 297 | 279 | 0 | 0 | 0 | 1 | 3 | 0 | 0 | 0 | 0 |
| *HLA-B/HLA-C* | 3792 | 3792 | 3713 | 6 | 21 | 1 | 300 | 292 | 320 | 24 | 30 | 22 |
| *HLA-DMA/HLA-DMB* | 432 | 432 | 600 | 6 | 6 | 3 | 1 | 0 | 0 | 0 | 0 | 0 |
| *HLA-DOA* | 232 | 261 | 435 | 0 | 0 | 0 | 2 | 0 | 1 | 0 | 0 | 2 |
| *HLA-DPA1* | 54 | 54 | 81 | 0 | 0 | 0 | 0 | 0 | 1 | 0 | 0 | 0 |
| *HLA-DPB1* | 468 | 624 | 1014 | 7 | 7 | 17 | 7 | 4 | 58 | 0 | 3 | 4 |
| *HLA-DQA1* | 42 | 42 | 96 | 2 | 2 | 14 | 4 | 4 | 17 | 0 | 0 | 8 |
| *HLA-DQA2* | 40 | 40 | 50 | 1 | 0 | 2 | 1 | 0 | 2 | 0 | 0 | 0 |
| *HLA-DQB1* | 30 | 30 | 48 | 1 | 0 | 4 | 4 | 5 | 14 | 0 | 0 | 1 |
| *HLA-DQB2* | 35 | 35 | 45 | 0 | 0 | 1 | 0 | 0 | 0 | 0 | 0 | 0 |
| *HLA-DRA* | 108 | 108 | 168 | 0 | 0 | 0 | 0 | 0 | 7 | 0 | 0 | 2 |
| *HLA-DRB1* | 22 | 22 | 36 | 0 | 0 | 0 | 0 | 1 | 2 | 0 | 0 | 1 |
| *HLA-E* | 42 | 42 | 42 | 0 | 0 | 0 | 0 | 0 | 0 | 0 | 0 | 0 |
| *HLA-F* | 390 | 416 | 403 | 1 | 1 | 2 | 1 | 6 | 9 | 1 | 0 | 1 |
| *HLA-G* | 96 | 108 | 108 | 5 | 5 | 5 | 2 | 1 | 3 | 1 | 0 | 2 |
| *HOXA5* | 6 | 6 | 6 | 0 | 0 | 0 | 0 | 0 | 0 | 0 | 0 | 0 |
| *HOXA9* | 7 | 14 | 7 | 0 | 0 | 1 | 0 | 0 | 0 | 0 | 0 | 0 |
| *HSPA1A/HSPA1B* | 8 | 12 | 8 | 0 | 0 | 0 | 0 | 0 | 0 | 0 | 0 | 0 |
| *HSPA1L* | 12 | 9 | 9 | 0 | 0 | 0 | 0 | 0 | 0 | 0 | 0 | 0 |
| *ICAM1* | 120 | 100 | 130 | 0 | 0 | 0 | 0 | 0 | 0 | 0 | 0 | 0 |
| *ICAM5* | 120 | 132 | 132 | 0 | 0 | 0 | 0 | 0 | 0 | 0 | 0 | 0 |
| *ICOS* | 130 | 100 | 30 | 0 | 0 | 0 | 0 | 1 | 0 | 0 | 0 | 0 |
| *IER3* | 4 | 4 | 4 | 0 | 0 | 0 | 0 | 0 | 0 | 0 | 0 | 0 |
| *IFIH1* | 192 | 192 | 192 | 0 | 0 | 0 | 0 | 0 | 0 | 0 | 0 | 0 |
| *IKZF1* | 598 | 572 | 520 | 0 | 4 | 0 | 0 | 1 | 4 | 0 | 0 | 0 |
| *IKZF3* | 102 | 120 | 120 | 0 | 0 | 0 | 0 | 0 | 0 | 0 | 0 | 0 |
| *IKZF4* | 80 | 95 | 70 | 0 | 0 | 0 | 0 | 0 | 0 | 0 | 0 | 0 |
| *IL10* | 80 | 64 | 80 | 0 | 0 | 0 | 0 | 0 | 0 | 0 | 0 | 0 |
| *IL19* | 88 | 66 | 242 | 0 | 0 | 0 | 0 | 0 | 0 | 0 | 0 | 0 |
| *IL2* | 3 | 2 | 2 | 0 | 0 | 0 | 0 | 0 | 0 | 0 | 0 | 0 |
| *IL20* | 0 | 0 | 3 | 0 | 0 | 0 | 0 | 0 | 0 | 0 | 0 | 0 |
| *IL21* | 5 | 5 | 5 | 0 | 0 | 0 | 0 | 0 | 0 | 0 | 0 | 0 |
| *IL23A* | 14 | 12 | 14 | 0 | 0 | 0 | 0 | 0 | 0 | 0 | 0 | 0 |
| *IL27* | 18 | 18 | 36 | 2 | 2 | 1 | 0 | 0 | 0 | 0 | 0 | 0 |
| *IL2RA* | 1216 | 896 | 1280 | 0 | 0 | 0 | 8 | 0 | 2 | 0 | 0 | 0 |
| *IL7R* | 240 | 250 | 160 | 0 | 1 | 0 | 1 | 0 | 2 | 1 | 0 | 0 |
| *INS-IGF2* | 9 | 9 | 9 | 2 | 1 | 0 | 0 | 0 | 0 | 0 | 0 | 0 |
| *ITGB1* | 129 | 117 | 117 | 0 | 0 | 0 | 0 | 0 | 0 | 0 | 0 | 0 |
| *ITGB7* | 90 | 88 | 82 | 0 | 0 | 0 | 0 | 0 | 0 | 0 | 0 | 0 |
| *IZUMO1/RASIP1* | 105 | 105 | 90 | 0 | 0 | 0 | 0 | 0 | 0 | 1 | 0 | 0 |
| *KCNH7* | 0 | 0 | 40 | 0 | 0 | 0 | 0 | 0 | 0 | 0 | 0 | 0 |
| *KEAP1* | 168 | 175 | 147 | 0 | 0 | 0 | 0 | 0 | 1 | 0 | 0 | 0 |
| *KIAA1109* | 6510 | 6545 | 6300 | 12 | 4 | 3 | 12 | 9 | 21 | 0 | 0 | 0 |
| *KIF5A* | 198 | 378 | 108 | 0 | 0 | 0 | 0 | 0 | 0 | 0 | 0 | 0 |
| *KIFC1* | 30 | 32 | 32 | 0 | 0 | 0 | 0 | 0 | 0 | 0 | 0 | 0 |
| *KLRB1* | 192 | 208 | 176 | 0 | 0 | 0 | 0 | 0 | 0 | 0 | 0 | 0 |
| *KRT222/SMARCE1* | 112 | 112 | 124 | 2 | 2 | 0 | 0 | 0 | 0 | 1 | 0 | 0 |
| *LIF* | 5 | 5 | 5 | 0 | 0 | 0 | 0 | 0 | 0 | 0 | 0 | 0 |
| *LONRF2* | 42 | 42 | 42 | 4 | 0 | 5 | 0 | 0 | 0 | 0 | 0 | 0 |
| *LRRC2* | 656 | 656 | 41 | 0 | 2 | 0 | 0 | 0 | 0 | 0 | 0 | 0 |
| *LSM2* | 34 | 34 | 34 | 0 | 0 | 0 | 0 | 0 | 0 | 0 | 0 | 0 |
| *LST1* | 24 | 24 | 22 | 0 | 0 | 1 | 0 | 0 | 0 | 0 | 0 | 0 |
| *LTA* | 35 | 40 | 35 | 0 | 0 | 0 | 0 | 0 | 0 | 0 | 0 | 0 |
| *LTB* | 14 | 14 | 10 | 0 | 0 | 0 | 1 | 0 | 0 | 0 | 0 | 0 |
| *LTF* | 102 | 102 | 0 | 0 | 0 | 0 | 0 | 0 | 0 | 0 | 0 | 0 |
| *LY6G5C* | 21 | 21 | 18 | 1 | 3 | 0 | 0 | 0 | 0 | 0 | 3 | 0 |
| *LY6G6E/BAT5* | 222 | 228 | 216 | 0 | 0 | 0 | 0 | 0 | 1 | 0 | 0 | 0 |
| *MACROD1* | 95 | 95 | 85 | 0 | 0 | 0 | 1 | 0 | 0 | 0 | 0 | 0 |
| *MAGI3* | 1815 | 1430 | 330 | 0 | 0 | 0 | 0 | 0 | 0 | 0 | 0 | 0 |
| *MAMSTR* | 81 | 90 | 72 | 1 | 0 | 0 | 0 | 1 | 0 | 0 | 0 | 0 |
| *MAPKAPK2* | 280 | 280 | 266 | 0 | 0 | 1 | 0 | 0 | 1 | 0 | 0 | 0 |
| *MAPKAPK5* | 215 | 225 | 210 | 0 | 0 | 0 | 1 | 1 | 0 | 0 | 0 | 0 |
| *MAPT* | 8 | 2 | 2 | 0 | 0 | 0 | 0 | 0 | 0 | 0 | 0 | 0 |
| *MARCH9* | 15 | 15 | 15 | 0 | 0 | 0 | 0 | 0 | 0 | 0 | 0 | 0 |
| *MDC1* | 160 | 155 | 155 | 1 | 0 | 0 | 1 | 1 | 1 | 0 | 0 | 0 |
| *MED1* | 245 | 252 | 238 | 0 | 0 | 0 | 0 | 0 | 1 | 0 | 0 | 0 |
| *MED24/SNORD124* | 915 | 915 | 930 | 0 | 0 | 8 | 0 | 0 | 17 | 0 | 0 | 0 |
| *METTL1* | 22 | 22 | 24 | 0 | 0 | 0 | 0 | 0 | 0 | 0 | 0 | 0 |
| *MICB* | 144 | 156 | 144 | 0 | 0 | 0 | 4 | 6 | 2 | 0 | 0 | 0 |
| *MORF4L1* | 1156 | 1088 | 1190 | 2 | 0 | 2 | 0 | 6 | 0 | 0 | 0 | 0 |
| *MRPS18B* | 28 | 28 | 28 | 0 | 0 | 0 | 0 | 0 | 0 | 0 | 0 | 0 |
| *MSH5/C6orf26* | 385 | 385 | 448 | 0 | 0 | 2 | 1 | 3 | 6 | 0 | 0 | 0 |
| *MTMR3* | 943 | 943 | 943 | 1 | 1 | 0 | 0 | 0 | 0 | 0 | 0 | 0 |
| *MYL6B* | 120 | 115 | 130 | 0 | 0 | 0 | 0 | 0 | 0 | 0 | 0 | 0 |
| *NAA25* | 583 | 583 | 583 | 1 | 3 | 0 | 0 | 4 | 4 | 0 | 0 | 0 |
| *NCR3* | 24 | 33 | 30 | 0 | 0 | 0 | 0 | 0 | 0 | 0 | 0 | 0 |
| *NEU1* | 9 | 9 | 9 | 0 | 0 | 0 | 0 | 0 | 0 | 0 | 0 | 0 |
| *NEUROD2* | 4 | 4 | 4 | 0 | 0 | 0 | 0 | 0 | 0 | 0 | 0 | 0 |
| *NF2* | 700 | 700 | 680 | 0 | 0 | 0 | 0 | 0 | 1 | 0 | 0 | 0 |
| *NFATC2IP* | 96 | 92 | 88 | 0 | 0 | 0 | 0 | 0 | 0 | 0 | 0 | 0 |
| *NFKBIL1* | 117 | 108 | 90 | 0 | 0 | 0 | 0 | 0 | 0 | 0 | 0 | 0 |
| *NOTCH4/GPSM3* | 525 | 455 | 560 | 0 | 0 | 0 | 1 | 0 | 1 | 0 | 0 | 0 |
| *NRM* | 68 | 68 | 68 | 0 | 0 | 0 | 0 | 0 | 0 | 0 | 0 | 0 |
| *NSF* | 120 | 114 | 123 | 1 | 0 | 0 | 0 | 0 | 2 | 0 | 0 | 0 |
| *NTN5* | 63 | 72 | 36 | 0 | 0 | 0 | 0 | 0 | 0 | 0 | 0 | 0 |
| *NUDT22/DNAJC4* | 30 | 31 | 29 | 0 | 0 | 0 | 0 | 0 | 0 | 0 | 0 | 0 |
| *NUPR1* | 2 | 2 | 2 | 0 | 0 | 0 | 0 | 0 | 0 | 0 | 0 | 0 |
| *OLFML3* | 16 | 16 | 16 | 0 | 0 | 0 | 0 | 0 | 0 | 0 | 0 | 0 |
| *ORMDL3* | 91 | 98 | 77 | 9 | 3 | 7 | 1 | 8 | 12 | 0 | 0 | 0 |
| *OS9* | 319 | 297 | 308 | 0 | 0 | 0 | 4 | 3 | 6 | 0 | 0 | 0 |
| *OSM* | 72 | 60 | 72 | 0 | 0 | 0 | 0 | 0 | 0 | 0 | 0 | 0 |
| *PAN2/CNPY2/CS* | 792 | 800 | 768 | 0 | 0 | 0 | 0 | 0 | 2 | 0 | 0 | 0 |
| *PBX2/AGER* | 216 | 216 | 216 | 0 | 0 | 0 | 0 | 0 | 0 | 0 | 2 | 0 |
| *PDE4A* | 450 | 435 | 405 | 0 | 0 | 0 | 0 | 1 | 1 | 0 | 0 | 0 |
| *PFDN6* | 12 | 12 | 12 | 0 | 0 | 0 | 0 | 0 | 0 | 0 | 0 | 0 |
| *PGAP3* | 105 | 105 | 105 | 0 | 0 | 2 | 0 | 3 | 2 | 0 | 0 | 0 |
| *PHF1* | 43 | 42 | 43 | 1 | 0 | 0 | 0 | 0 | 0 | 0 | 0 | 0 |
| *PHTF1/RPS2P14* | 495 | 495 | 495 | 0 | 0 | 2 | 1 | 0 | 1 | 0 | 0 | 0 |
| *PIP4K2C* | 125 | 125 | 120 | 0 | 0 | 0 | 0 | 0 | 0 | 0 | 0 | 0 |
| *PNMT* | 4 | 4 | 2 | 0 | 0 | 0 | 0 | 0 | 0 | 0 | 0 | 0 |
| *POU5F1* | 128 | 128 | 128 | 0 | 0 | 2 | 0 | 0 | 0 | 0 | 0 | 0 |
| *PPP1R10* | 168 | 168 | 156 | 0 | 0 | 0 | 0 | 0 | 1 | 0 | 0 | 0 |
| *PPP1R11* | 96 | 96 | 96 | 0 | 0 | 0 | 1 | 0 | 0 | 0 | 0 | 0 |
| *PPP1R1B* | 10 | 10 | 10 | 0 | 0 | 0 | 0 | 0 | 0 | 0 | 0 | 0 |
| *PPT2/EGFL8* | 148 | 156 | 104 | 0 | 0 | 0 | 0 | 0 | 0 | 0 | 0 | 0 |
| *PRDX5* | 15 | 16 | 16 | 0 | 0 | 0 | 0 | 0 | 0 | 0 | 0 | 0 |
| *PRKCQ* | 3784 | 3784 | 2408 | 2 | 9 | 1 | 6 | 1 | 1 | 1 | 1 | 0 |
| *PRKD2* | 912 | 950 | 874 | 0 | 0 | 0 | 0 | 0 | 0 | 0 | 0 | 0 |
| *PRR3* | 9 | 9 | 9 | 0 | 0 | 0 | 0 | 0 | 0 | 0 | 0 | 0 |
| *PRRT1* | 54 | 60 | 12 | 0 | 0 | 0 | 0 | 0 | 0 | 0 | 0 | 0 |
| *PSMB8* | 209 | 190 | 171 | 0 | 0 | 2 | 0 | 0 | 0 | 0 | 0 | 0 |
| *PSMB9* | 494 | 494 | 494 | 6 | 1 | 8 | 3 | 3 | 12 | 0 | 0 | 1 |
| *PSMD3* | 203 | 210 | 203 | 0 | 0 | 0 | 0 | 0 | 1 | 0 | 0 | 0 |
| *PTPN11* | 248 | 248 | 248 | 0 | 3 | 0 | 0 | 3 | 0 | 0 | 0 | 0 |
| *PTPN2* | 1944 | 1944 | 1836 | 0 | 5 | 0 | 0 | 6 | 3 | 0 | 0 | 0 |
| *PTPN22* | 368 | 440 | 360 | 0 | 0 | 0 | 2 | 0 | 3 | 0 | 0 | 0 |
| *RAB5B* | 90 | 90 | 90 | 0 | 0 | 0 | 0 | 0 | 0 | 0 | 0 | 0 |
| *RABEP2* | 136 | 156 | 176 | 0 | 0 | 0 | 0 | 0 | 0 | 0 | 0 | 0 |
| *RAC2* | 650 | 676 | 676 | 0 | 0 | 1 | 0 | 0 | 0 | 0 | 0 | 0 |
| *RASGRF1* | 20 | 20 | 380 | 0 | 0 | 1 | 0 | 0 | 0 | 0 | 0 | 0 |
| *RASGRP1* | 735 | 750 | 540 | 0 | 3 | 2 | 0 | 0 | 3 | 0 | 0 | 0 |
| *RBM17* | 736 | 736 | 736 | 0 | 0 | 0 | 0 | 0 | 0 | 0 | 0 | 1 |
| *RGL2* | 105 | 108 | 108 | 0 | 0 | 0 | 0 | 0 | 0 | 0 | 0 | 0 |
| *RING1* | 33 | 33 | 33 | 1 | 0 | 0 | 0 | 0 | 0 | 0 | 0 | 0 |
| *RNF39* | 21 | 21 | 21 | 0 | 0 | 0 | 0 | 0 | 0 | 0 | 0 | 0 |
| *RNF41* | 63 | 63 | 72 | 0 | 0 | 0 | 2 | 0 | 0 | 0 | 0 | 0 |
| *RNF5* | 1625 | 1750 | 2375 | 40 | 0 | 24 | 3 | 1 | 3 | 1 | 0 | 2 |
| *RNLS* | 994 | 994 | 994 | 0 | 0 | 1 | 0 | 0 | 1 | 0 | 0 | 1 |
| *RPL18/FAM83E* | 224 | 238 | 224 | 0 | 0 | 0 | 0 | 4 | 0 | 0 | 0 | 0 |
| *RPL41/ZC3H10* | 36 | 36 | 36 | 0 | 0 | 0 | 1 | 0 | 1 | 0 | 0 | 0 |
| *RPS18* | 14 | 14 | 14 | 0 | 0 | 0 | 0 | 0 | 0 | 0 | 0 | 0 |
| *RPS26* | 6 | 6 | 6 | 0 | 0 | 0 | 0 | 0 | 0 | 0 | 0 | 0 |
| *RPS6KA4* | 45 | 44 | 41 | 0 | 0 | 0 | 0 | 0 | 0 | 0 | 0 | 0 |
| *RSBN1* | 156 | 168 | 144 | 0 | 0 | 0 | 0 | 0 | 0 | 0 | 0 | 0 |
| *RSPH3* | 84 | 84 | 84 | 0 | 0 | 0 | 0 | 0 | 0 | 0 | 0 | 0 |
| *RTP3* | 6 | 6 | 0 | 0 | 0 | 0 | 0 | 0 | 0 | 0 | 0 | 0 |
| *RXRB* | 63 | 63 | 60 | 0 | 0 | 0 | 0 | 0 | 0 | 0 | 0 | 0 |
| *S1PR5* | 18 | 24 | 12 | 0 | 0 | 0 | 0 | 0 | 0 | 0 | 0 | 0 |
| *SBK1* | 91 | 104 | 78 | 0 | 0 | 0 | 0 | 0 | 0 | 0 | 0 | 0 |
| *SH2B1* | 99 | 105 | 99 | 0 | 0 | 0 | 0 | 0 | 0 | 0 | 0 | 0 |
| *SH2B3* | 72 | 72 | 88 | 0 | 0 | 0 | 0 | 0 | 0 | 0 | 0 | 0 |
| *SIRPB1/SIRPD* | 416 | 448 | 384 | 3 | 0 | 18 | 0 | 0 | 0 | 0 | 0 | 0 |
| *SIRPG* | 611 | 658 | 188 | 12 | 2 | 0 | 6 | 3 | 0 | 0 | 0 | 0 |
| *SKAP2* | 1950 | 1950 | 2100 | 9 | 2 | 8 | 7 | 2 | 1 | 0 | 0 | 0 |
| *SKIV2L* | 336 | 336 | 343 | 0 | 0 | 0 | 0 | 0 | 2 | 0 | 0 | 0 |
| *SLC1A5* | 247 | 247 | 285 | 0 | 0 | 2 | 0 | 0 | 0 | 0 | 0 | 0 |
| *SLC39A5* | 9 | 8 | 7 | 0 | 0 | 0 | 0 | 0 | 0 | 0 | 0 | 0 |
| *SLC39A7/HSD17B8* | 96 | 99 | 90 | 0 | 0 | 0 | 0 | 0 | 0 | 0 | 0 | 0 |
| *SMARCC2* | 612 | 603 | 567 | 0 | 0 | 0 | 0 | 0 | 0 | 0 | 0 | 0 |
| *SPEF2* | 1496 | 1738 | 352 | 0 | 1 | 1 | 2 | 2 | 0 | 0 | 0 | 0 |
| *SPHK2* | 80 | 85 | 85 | 0 | 0 | 0 | 0 | 0 | 0 | 0 | 1 | 0 |
| *SPNS1/LAT* | 236 | 244 | 184 | 1 | 0 | 2 | 2 | 1 | 3 | 0 | 0 | 0 |
| *SPRYD3* | 23 | 23 | 23 | 0 | 0 | 0 | 0 | 0 | 0 | 0 | 0 | 0 |
| *SSTR3* | 40 | 40 | 40 | 6 | 1 | 0 | 0 | 0 | 0 | 0 | 0 | 0 |
| *STARD3* | 324 | 315 | 297 | 0 | 0 | 1 | 0 | 1 | 0 | 0 | 0 | 0 |
| *STAT1* | 1664 | 1690 | 1664 | 0 | 1 | 1 | 0 | 3 | 6 | 0 | 0 | 0 |
| *STAT2* | 47 | 47 | 48 | 0 | 0 | 0 | 0 | 0 | 0 | 0 | 0 | 0 |
| *STAT4* | 2145 | 2301 | 1950 | 5 | 12 | 2 | 0 | 16 | 4 | 0 | 0 | 0 |
| *STK19/C4A* | 249 | 246 | 228 | 0 | 0 | 0 | 3 | 1 | 0 | 0 | 0 | 0 |
| *STRN4* | 705 | 720 | 690 | 0 | 0 | 0 | 0 | 0 | 0 | 0 | 0 | 0 |
| *SULT1A1* | 28 | 30 | 26 | 0 | 0 | 0 | 1 | 1 | 1 | 0 | 0 | 0 |
| *SULT1A2* | 40 | 40 | 36 | 0 | 0 | 0 | 0 | 0 | 0 | 0 | 0 | 0 |
| *SULT2B1* | 140 | 112 | 14 | 0 | 0 | 0 | 0 | 0 | 0 | 0 | 0 | 0 |
| *SUOX* | 24 | 24 | 18 | 0 | 1 | 0 | 0 | 0 | 0 | 0 | 0 | 0 |
| *SYNGAP1/ZBTB9* | 176 | 176 | 156 | 9 | 0 | 0 | 10 | 2 | 0 | 2 | 0 | 0 |
| *TAGAP* | 126 | 114 | 120 | 3 | 0 | 0 | 9 | 0 | 0 | 0 | 0 | 0 |
| *TAP1* | 364 | 364 | 350 | 0 | 0 | 5 | 0 | 0 | 0 | 0 | 2 | 2 |
| *TAP2/HLA-DOB* | 1848 | 1890 | 2058 | 34 | 35 | 27 | 26 | 31 | 11 | 3 | 7 | 6 |
| *TAPBP* | 60 | 60 | 57 | 0 | 0 | 0 | 0 | 0 | 0 | 0 | 0 | 0 |
| *TCAP* | 12 | 12 | 12 | 0 | 0 | 0 | 0 | 0 | 0 | 0 | 0 | 0 |
| *TCF19* | 88 | 88 | 88 | 0 | 0 | 0 | 0 | 0 | 0 | 0 | 0 | 0 |
| *THRA* | 247 | 247 | 221 | 8 | 7 | 0 | 5 | 1 | 0 | 0 | 0 | 0 |
| *TM9SF2* | 34 | 33 | 33 | 0 | 0 | 0 | 0 | 0 | 0 | 0 | 0 | 0 |
| *TMEM116* | 312 | 300 | 216 | 0 | 0 | 0 | 0 | 0 | 0 | 0 | 0 | 0 |
| *TMEM170A/CFDP1* | 1924 | 1924 | 1716 | 3 | 20 | 19 | 0 | 2 | 0 | 0 | 0 | 0 |
| *TMPRSS3/TFF1* | 572 | 572 | 66 | 7 | 1 | 0 | 2 | 2 | 0 | 0 | 0 | 0 |
| *TNF* | 20 | 20 | 20 | 0 | 0 | 0 | 0 | 0 | 0 | 0 | 0 | 0 |
| *TNFAIP3* | 29 | 33 | 28 | 0 | 0 | 0 | 0 | 0 | 0 | 0 | 0 | 0 |
| *TRAFD1* | 68 | 66 | 66 | 0 | 0 | 0 | 0 | 0 | 0 | 0 | 0 | 0 |
| *TRIM26* | 600 | 624 | 600 | 0 | 0 | 0 | 5 | 1 | 6 | 0 | 0 | 0 |
| *TRIM31* | 90 | 90 | 30 | 7 | 2 | 0 | 0 | 0 | 0 | 0 | 0 | 0 |
| *TRIM39/RPP21* | 429 | 468 | 416 | 0 | 0 | 0 | 2 | 0 | 3 | 0 | 0 | 0 |
| *TRMT112* | 4 | 4 | 4 | 0 | 0 | 0 | 0 | 0 | 0 | 0 | 0 | 0 |
| *TSPAN31* | 44 | 44 | 40 | 0 | 0 | 0 | 0 | 0 | 0 | 0 | 0 | 0 |
| *TUBB* | 14 | 14 | 14 | 0 | 0 | 0 | 0 | 0 | 0 | 0 | 0 | 0 |
| *TUFM* | 20 | 20 | 20 | 0 | 0 | 0 | 0 | 0 | 0 | 0 | 0 | 0 |
| *TYK2* | 826 | 826 | 854 | 0 | 0 | 0 | 1 | 0 | 2 | 0 | 0 | 0 |
| *UBAC2* | 490 | 462 | 378 | 0 | 0 | 0 | 0 | 0 | 0 | 0 | 0 | 0 |
| *UBASH3A* | 2208 | 2162 | 1242 | 36 | 14 | 0 | 5 | 1 | 0 | 11 | 1 | 0 |
| *UGT3A2* | 4 | 4 | 8 | 0 | 0 | 0 | 0 | 0 | 0 | 0 | 0 | 0 |
| *UQCR10* | 15 | 15 | 15 | 0 | 0 | 0 | 0 | 0 | 0 | 0 | 0 | 0 |
| *VARS* | 216 | 220 | 228 | 0 | 0 | 0 | 0 | 0 | 0 | 0 | 0 | 0 |
| *VEGFB* | 15 | 15 | 19 | 0 | 0 | 0 | 0 | 0 | 0 | 0 | 0 | 0 |
| *VPS52* | 78 | 76 | 74 | 0 | 0 | 0 | 0 | 0 | 0 | 0 | 0 | 0 |
| *WDR46* | 145 | 145 | 145 | 0 | 0 | 0 | 0 | 0 | 0 | 0 | 0 | 0 |
| *WNT3* | 1 | 1 | 3 | 0 | 0 | 0 | 0 | 0 | 0 | 0 | 0 | 0 |
| *XCR1* | 4 | 8 | 4 | 0 | 0 | 0 | 0 | 0 | 0 | 0 | 0 | 0 |
| *XRCC6BP1* | 12 | 13 | 12 | 0 | 0 | 0 | 0 | 0 | 0 | 0 | 0 | 0 |
| *ZBTB12* | 10 | 10 | 10 | 0 | 0 | 0 | 0 | 0 | 0 | 0 | 0 | 0 |
| *ZBTB22* | 16 | 16 | 20 | 0 | 0 | 0 | 0 | 0 | 0 | 0 | 0 | 0 |
| *ZMAT5* | 225 | 225 | 225 | 0 | 1 | 0 | 0 | 5 | 0 | 0 | 0 | 0 |
| *ZNF740* | 19 | 20 | 18 | 0 | 0 | 0 | 0 | 0 | 0 | 0 | 0 | 0 |
| *ZNRD1* | 152 | 152 | 152 | 0 | 0 | 0 | 0 | 0 | 0 | 0 | 0 | 0 |
| *ZPBP2* | 12 | 6 | 24 | 0 | 0 | 0 | 0 | 0 | 0 | 0 | 0 | 0 |
