# Supplementary material for: Disease-specific biases in alternative splicing and tissue-specific dysregulation revealed by multitissue profiling of lymphocyte gene expression in type 1 diabetes
Source: HighWire-hosted journal article supplement (doi:10.1101/gr.217984.116), 2017-10-12
Supplement: Supplemental_Table_S6.docx [file Supplemental_Table_S6.docx]

**Table 3. Significant cis-s/eQTL for top T1D-associated SNPs by chromosome**

| **Chromosome** | **Position (bp)** | **Index**  **SNP a** | **Cell type** | **Number of significant cis-eQTL at FDR<0.05 (magnitude)** | **Number of significant cis-sQTL at FDR<0.05 (magnitude)** | **Genes** |
| --- | --- | --- | --- | --- | --- | --- |
| 5p13.2 | 35883251 | rs11954020 | CD19+ | 0 | 19  (0.464 b) | *IL7R* c |
| 6q15 | 90976768 | rs72928038 | CD8+ | 2  (1.117 - 1.504) | 0 | *BACH2* d |
| 6q22.32 | 1.27E+08 | rs1538171 | CD4+ | 19  (0.743 b) | 0 | *CENPW* d |
| 6q22.32 | 1.27E+08 | rs1538171 | CD8+ | 19  (0.618 b) | 0 | *CENPW* d |
| 6q22.32 | 1.27E+08 | rs1538171 | CD19+ | 38  (0.685 - 0.785) | 19  (0.879 b) | *CENPW* |
| 7p12.2 | 50465830 | rs62447205 | CD4+ | 1  (0.822) | 2  (0.107 - 0.407) | *FIGNL1* |
| 7p12.2 | 50465830 | rs62447205 | CD8+ | 1  (0.860) | 2  (0.090 - 0.185) | *FIGNL1* |
| 7p12.2 | 50465830 | rs62447205 | CD19+ | 1  (0.851) | 1  (0.182) | *FIGNL1* |
| 10p15.1 | 6129643 | rs41295121 | CD19+ | 0 | 1  (0.188) | *RBM17* c |
| 12p13.31 | 9905851 | rs917911 | CD19+ | 0 | 6  (0.938 - 0.941) | *CLECL1* c |
| 12p13.31 | 9905851 | rs917911 | CD4+ | 35  (0.737 - 1.481) | 11  (0.626 - 1.443) | *CLEC2D*/*NPM1P16*/*NPM1P7*, *CLECL1* d |
| 12p13.31 | 9905851 | rs917911 | CD8+ | 26  (1.315 - 1.368) | 0 | *CLECL1* d |
| 12q13.2 | 56435504 | rs705705 | CD8+ | 1  (0.410) | 10  (0.717 - 1.327) | *SUOX* d, *ERBB3*/*PA2G4* c |
| 16p11.2 | 28505660 | rs151234 | CD19+ | 1  (2.040) | 0 | *IL27* d |
| 16p11.2 | 28505660 | rs151234 | CD4+ | 2  (1.607 - 2.342) | 0 | *IL27* d |
| 16p11.2 | 28505660 | rs151234 | CD8+ | 2  (1.476 - 1.848) | 0 | *IL27* d |
| 17q12 | 38053207 | rs12453507 | CD19+ | 158  (0.498 - 1.579) | 85  (0.165 - 2.840) | *GSDMB*, *ORMDL3*, *wanima* d |
| 17q12 | 38053207 | rs12453507 | CD4+ | 84  (0.015 - 1.660) | 33  (0.020 - 177.095) | *GSDMA*, *GSDMB*, *ORMDL3* d |
| 17q12 | 38053207 | rs12453507 | CD8+ | 121  (0.089 - 91.765) | 147  (0.006 - 148.631) | *GSDMA* d, *GSDMB*, *ORMDL3* |
| 17q21.2 | 38775150 | rs757411 | CD19+ | 18  (0.835 - 0.845) | 0 | *KRT222*/*SMARCE1* d, *sloyror* d |
| 17q21.2 | 38775150 | rs757411 | CD4+ | 18  (1.071 - 1.075) | 0 | *KRT222*/*SMARCE1* d |
| 17q21.2 | 38775150 | rs757411 | CD8+ | 18  (1.079 - 1.080) | 0 | *KRT222*/*SMARCE1* d |
| 17q21.31 | 44073889 | rs1052553 | CD19+ | 2  (1.112 - 1.196) | 1  (0.608) | *C17orf69*/*CRHR1* d, *NSF* c |
| 17q21.31 | 44073889 | rs1052553 | CD4+ | 2  (1.071 - 1.127) | 1  (0.984) | *C17orf69*/*CRHR1* |
| 17q21.31 | 44073889 | rs1052553 | CD8+ | 1  (1.132) | 0 | *C17orf69*/*CRHR1* d |
| 18p11.21 | 12809340 | rs1893217 | CD8+ | 3  (0.993 - 1.022) | 6  (0.995 - 1.006) | *PTPN2* |
| 18q22.2 | 67526644 | rs1615504 | CD4+ | 24  (0.420 - 0.477) | 0 | *CD226* d, *DOK6* d |
| 18q22.2 | 67526644 | rs1615504 | CD8+ | 12  (0.291 b) | 0 | *CD226* d |
| 19p13.2 | 10469975 | rs12720356 | CD19+ | 0 | 1  (0.157) | *TYK2* c |
| 20p13 | 1616206 | rs6043409 | CD4+ | 13  (0.739 - 0.793) | 10  (0.788 - 0.843) | *SIRPG* |
| 20p13 | 1616206 | rs6043409 | CD8+ | 6  (0.709 - 0.732) | 10  (0.207 - 0.336) | *SIRPG* |
| 21q22.3 | 43825357 | rs11203202 | CD4+ | 4  (1.352 - 1.374) | 0 | *TMPRSS3*/*TFF1* d,  *UBASH3A* d |
| 22q12.2 | 30531091 | rs4820830 | CD4+ | 6  (0.843 b) | 0 | *MTMR3* d |
| 22q12.2 | 30531091 | rs4820830 | CD8+ | 0 | 1  (0.200) | *ASCC2* c |
| 22q12.2 | 30531091 | rs4820830 | CD19+ | 0 | 7  (0.191 b) | *ASCC2* c |
| 22q12.3 | 37587111 | rs229533 | CD4+ | 3  (0.349 b) | 5  (3.219 b) | *SSTR3* d, *C1QTNF6*/*IL2RB* c |
| 22q12.3 | 37587111 | rs229533 | CD8+ | 0 | 5  (2.425 b) | *C1QTNF6*/*IL2RB* c |

a From Table 1 of Onengut-Gumuscu et al 2015

­b Magnitude the same for all cis-s/eQTL

c Splicing event cis-sQTL only

­d Exon cis-eQTL only
