# Supplementary material for: Disease-specific biases in alternative splicing and tissue-specific dysregulation revealed by multitissue profiling of lymphocyte gene expression in type 1 diabetes
Source: HighWire-hosted journal article supplement (doi:10.1101/gr.217984.116), 2017-10-12
Supplement: Supplemental_Table_S7.docx [file Supplemental_Table_S7.docx]

**Supplementary Table S7. SNPs tested as *cis*-eQTLs in LD with “credible” T1D-associated SNPs**

[Due to file size constraints, Supplemental Table S7 located here: <https://bio.rc.ufl.edu/pub/mcintyre/t1d_splicing/Supplemental_Table_S7.csv> ]
